# Supplementary material for: Quality Control of Biomedicinal Allergen Products – Highly Complex Isoallergen Composition Challenges Standard MS Database Search and Requires Manual Data Analyses
Source: PLOS journal article supplement (doi:10.1371/journal.pone.0142404), 2015-11-11

Table S1: Summary of the MS data of the identification non-allergenic proteins of birch pollen

| Gel | Spot | Acc. No. | Protein name                                   | score                                      | SeqCov | P.  | Error |      |
|-----|------|----------|------------------------------------------------|--------------------------------------------|--------|-----|-------|------|
| S2  | 4    | B9HRM9   | Predicted protein Fragment-P.trichocarpa       | 673                                        | 13     | 2   | 4.4   |      |
|     | 5    | D9ZIQ8   | BZIP domain class transcription factor         | 107                                        | 2      | 1   | 1.6   |      |
|     |      | D8TBQ5   | Putative uncharacterized protein               | 23                                         | 1      | 1   | 2.2   |      |
|     | 6    | B9HRM9   | Predicted protein Fragment-P.trichocarpa       | 1253                                       | 16     | 3   | 3.0   |      |
|     | 8    | Q676X7   | Serine threonine kinase-H.orientalis           | 2064                                       | 24     | 3   | 2.4   |      |
|     | 10   | Q676X7   | Serine threonine kinase-H.orientalis           | 3645                                       | 24     | 3   | 3.2   |      |
|     | 12   | P42739   | Polyubiquitin Fragment-A.cliftonii             | 89                                         | 4      | 2   | 2.5   |      |
|     | 19   | B9HRM9   | Predicted protein Fragment-P.trichocarpa       | 342                                        | 8      | 1   | 4.2   |      |
|     | 26   | C6TN38   | Putative uncharacterized protein               | 120                                        | 5      | 1   | 0.5   |      |
|     | 29   | Q5QNF4   | Os01g0217100 protein-O.sativa                  | 261                                        | 6      | 1   | 9.9   |      |
|     |      | P42644   | 14 3 3 like protein-A.thaliana                 | 1121                                       | 16     | 5   | 2.8   |      |
|     | 35   | Q7EZT3   | Putative GTP binding protein-O.sativa          | 151                                        | 2      | 1   | 2.3   |      |
|     | 36   | A5JTQ2   | Beta xylosidase alpha L arabinofuranosidase    | 828                                        | 2      | 1   | 3.5   |      |
|     | 37   | A5JTQ2   | Beta xylosidase alpha L arabinofuranosidase    | 2177                                       | 3      | 3   | 2.6   |      |
|     | 38   | A5JTQ2   | Beta xylosidase alpha L arabinofuranosidase    | 994                                        | 3      | 3   | 2.7   |      |
|     | S3   |          | P85925                                         | Unknown protein 18 Fragment-P.menziesii    | 12958  | 100 | 2     | 3.0  |
|     |      | 2        | D7R774                                         | Putative glycine rich RNA binding protein  | 1897   | 23  | 3     | 2.0  |
|     |      |          | A9PBC3                                         | Glutaredoxin-P.trichocarpa                 | 182    | 14  | 1     | 4.8  |
|     |      |          | D8T3L5                                         | Putative uncharacterized protein           | 98     | 4   | 1     | 4.7  |
| 3   |      |          | A5Z282                                         | Glutathione peroxidase Fragment            | 646    | 13  | 2     | 1.6  |
|     |      | B5M1Y7   | Glutathione peroxidase-R.australe              | 142                                        | 4      | 1   | 2.3   |      |
| 4   |      | B9HRM9   | Predicted protein Fragment-P.trichocarpa       | 5091                                       | 21     | 3   | 4.0   |      |
| 10  |      | A8HTK0   | Thioredoxin-Glycine max                        | 457                                        | 15     | 2   | 5.2   |      |
| 25  |      | P42739   | Polyubiquitin Fragment-A.cliftonii             | 11956                                      | 11     | 6   | 2.6   |      |
| S4  |      | 18       | C5YD96                                         | Putative uncharacterized protein-S.bicolor | 5      | 0   | 1     | 10.9 |
|     |      | D2X9U2   | Lambda class glutathione transferase           | 574                                        | 9      | 2   | 7.4   |      |
|     | 19   | D2WL71   | Lambda class glutathione transferase           | 342                                        | 8      | 2   | 8.3   |      |
|     |      | Q2XNS9   | Putative uncharacterized protein-A.officinalis | 148                                        | 4      | 1   | 6.0   |      |
|     | 43   | Q8LEB8   | Quinone oxidoreductase like protein            | 239                                        | 8      | 3   | 4.3   |      |
|     | 49   | A9PIJ2   | Predicted protein-P.trichocarpa                | 141                                        | 7      | 2   | 5.2   |      |
|     | 58   | B3VDY8   | UTP glucose 1 phosphate uridylyltransferase    | 195                                        | 5      | 2   | 1.7   |      |

| Gel | Spot | Acc. No. | Protein name                                    | score | SeqCov | P. | Error |
|-----|------|----------|-------------------------------------------------|-------|--------|----|-------|
|     | 1    | P42739   | Polyubiquitin Fragment-A.cliftonii              | 11310 | 9      | 8  | 2.3   |
|     | 2    | B4FI58   | Putative uncharacterized protein-Zea mays       | 436   | 3      | 1  | 2.8   |
|     |      | B4FI58   | Putative uncharacterized protein-Zea mays       | 535   | 3      | 1  | 1.4   |
|     | 3    | D7KLT8   | Putative uncharacterized protein-A.lyrata       | 46    | 8      | 2  | 5.4   |
|     |      | P85925   | Unknown protein 18 Fragment-P.menziesii         | 1784  | 100    | 2  | 1.7   |
|     |      | D7TQB6   | Putative uncharacterized protein-V.vinifera     | 1219  | 14     | 5  | 5.6   |
|     | 5    | D7M9C8   | Putative uncharacterized protein-A.lyrata       | 260   | 6      | 1  | 6.9   |
|     |      | C4MF37   | UDP glycosyltransferase Fragment-A.strigosa     | 174   | 11     | 1  | 5.5   |
|     |      | Q20CC1   | Fgenesh protein 125-B.vulgaris                  | 133   | 8      | 1  | 5.7   |
|     |      | A2ZNJ7   | Putative uncharacterized protein-O.sativa       | 53    | 3      | 3  | 3.9   |
|     |      | D1LWT8   | Triosephosphate isomerase-D.longan              | 3028  | 10     | 3  | 3.3   |
|     | 6    | D7KLT8   | Putative uncharacterized protein-A.lyrata       | 52    | 8      | 2  | 6.9   |
|     |      | E1Z4S1   | Putative uncharacterized protein-C.variabilis   | 47    | 1      | 1  | 1.6   |
| S5  | 8    | D7TQB6   | Putative uncharacterized protein-V.vinifera     | 1677  | 13     | 3  | 3.6   |
|     |      | Q9FQ95   | In2 1 protein-Glycine max                       | 547   | 5      | 1  | 2.5   |
|     | 10   | A5BNR6   | Putative uncharacterized protein-Vitis vinifera | 884   | 4      | 1  | 0.5   |
|     |      | C6T942   | Putative uncharacterized protein-Glycine max    | 1248  | 4      | 1  | 1.0   |
|     | 11   | C1IC54   | Cinnamyl alcohol dehydrogenase-G.hirsutum       | 233   | 6      | 2  | 1.8   |
|     |      | F2CUL2   | Predicted protein-H.vulgare var distichum       | 214   | 3      | 1  | 2.4   |
|     | 21   | A2ICP9   | Ran1-P.sativum                                  | 1108  | 18     | 5  | 2.5   |
|     |      | D7KLT8   | Putative uncharacterized protein-A.lyrata       | 97    | 8      | 2  | 3.3   |
|     | 22   | C6T942   | Putative uncharacterized protein-Glycine max    | 160   | 4      | 1  | 1.1   |
|     | 23   | G7K694   | Fructose biphosphate aldolase-M.truncatula      | 722   | 4      | 3  | 2.4   |
|     | 24   | F6GVW7   | Putative uncharacterized protein-V.vinifera     | 386   | 14     | 4  | 2.9   |
|     | 27   | B0FGG5   | Monodehydroascorbate reductase                  | 1222  | 3      | 1  | 1.4   |
|     | 28   | D2D2Z8   | Phosphoglycerate kinase-G.hirsutum              | 194   | 11     | 3  | 4.2   |
|     | 30   | B5SVF6   | Alcohol dehydrogenase Fragment-D.arborea        | 1396  | 10     | 2  | 3.3   |
|     |      | B9HRM9   | Predicted protein Fragment-P.trichocarpa        | 837   | 8      | 1  | 3.2   |
|     | 4    | B9REC4   | Serine threonine protein kinase putative        | 157   | 1      | 2  | 7.8   |
| S1  |      | D8UG87   | Putative uncharacterized protein-V.carteri      | 101   | 4      | 1  | 1.1   |
|     | 5    | B9HRM9   | Predicted protein Fragment-P.trichocarpa        | 2045  | 23     | 3  | 3.7   |
|     | 7    | O49813   | Olee1 like protein-B.pendula                    | 913   | 46     | 11 | 4.4   |

Gel & Spot refer to supplementary figure 1; Acc.No. refers to UniProt; SeqCov gives sequence coverage in %; P is number of identified peptides; Error is RMS mass error in ppm.

| <b>Gel</b> | <b>Spot</b> | <b>Acc. No.</b> | <b>Allergen</b> | <b>Score</b> | <b>SeqCov</b> | <b>P</b> | <b>Error</b> |
|------------|-------------|-----------------|-----------------|--------------|---------------|----------|--------------|
|            | 2           | A4K9Z8          | Bet v 2         | 2802         | 17            | 2        | 2.5          |
|            | 3           | Q39419          | Bet v 4         | 558          | 26            | 2        | 2.0          |
| <b>B</b>   | 7           | A4K9Z8          | Bet v 2         | 4268         | 8             | 1        | 2.0          |
|            | 9           | A4K9Z8          | Bet v 2         | 1079         | 8             | 1        | 4.1          |
|            | 16          | A4K9Z8          | Bet v 2         | 11242        | 57            | 8        | 3.4          |
|            | 9           | Q9FUW6          | Bet v 6         | 35265        | 75            | 23       | 3.5          |
| <b>D</b>   | 12          | Q9FUW6          | Bet v 6         | 17583        | 43            | 14       | 2.7          |
|            | 31          | Q9FUW6          | Bet v 6         | 3350         | 22            | 8        | 3.0          |
|            | 2           | Q8L5T1          | Bet v 7         | 291          | 28            | 4        | 1.6          |
|            | 8           | Q8L5T1          | Bet v 7         | 1073         | 39            | 7        | 3.2          |
| <b>E</b>   | 9           | Q8L5T1          | Bet v 7         | 1140         | 47            | 7        | 7.2          |
|            | 10          | Q8L5T1          | Bet v 7         | 626          | 35            | 6        | 7.7          |
|            | 11          | Q8L5T1          | Bet v 7         | 605          | 35            | 6        | 8.1          |

Gel & Spot refer to figure 1; Acc.No. refers to UniProt; SeqCov gives sequence coverage in %; P is number of identified peptides; Error is RMS mass error in ppm

Table S2: Summary of the MS data of the identification Bet v 2, 4, 6 and 7

Table S3: Summary of the MS data of the identification Bet v 1 isoforms and variants

| Gel    | Spot   | UniProt | Seq. Cov.%                         | assigned peptides            | Protein Error | N                      | P*               | Score | Peptide Error |
|--------|--------|---------|------------------------------------|------------------------------|---------------|------------------------|------------------|-------|---------------|
| B      | 20     | Q9SCI0  | 74                                 | T1,T2,T3,T4,T6,T7,T8,T10,T11 | 5.2           | -                      |                  | -     | -             |
|        |        | Q39427  | 49                                 | T1,T2,T3,T8,T11              | 4.6           | 4                      |                  | -     | -             |
|        |        | P43177  | 47                                 | T2,T3,T7,T8,T10,T11          | 5.1           |                        | T2: AFILDGDNLVPK | 8.2   | 0.9           |
|        |        | P43180  | 47                                 | T2,T3,T7,T8,T10,T11          | 5.1           |                        | T2: AFILEGDNLIPK | 7.5   | 2.8           |
| C      | 5      | P43186  | 55                                 | T1,T2,T3,T4,T8,T11           | 2.0           | 2                      |                  | -     | -             |
|        |        | P15494  | 41                                 | T3,T6,T8,T11                 | 2.0           |                        |                  | -     | -             |
|        | 6      | Q9SCI0  | 76                                 | T1,T2,T3,T4,T6,T7,T8,T10,T11 | 3.6           |                        |                  | -     | -             |
|        |        | P43180  | 68                                 | T1,T2,T3,T6,T7,T8,T10,T11    | 4.0           |                        | T2: AFILEGDNLIPK | 8.7   | 0.6           |
|        |        | P43186  | 60                                 | T1,T2,T3,T4,T8,T10,T11       | 4.3           | 5                      | T2: AFILDGDNLIPK | 9.0   | 1.0           |
|        |        | Q96370  | 74                                 | T1,T2,T3,T4,T6,T7,T8,T10,T11 | 3.8           |                        |                  | -     | -             |
|        |        | O23748  | 75                                 | T1,T2,T3,T4,T6,T7,T8,T10,T11 | 3.8           |                        |                  | -     | -             |
|        | 7      | P15494  | 31                                 | T3,T8,T11                    | 2.3           | 1                      |                  | -     | -             |
|        | 8      | P43177  | 67                                 | T1,T2,T3,T6,T7,T8,T10,T11    | 3.9           |                        |                  | -     | -             |
|        |        | P43180  | 67                                 | T1,T2,T3,T6,T7,T8,T10,T11    | 3.1           |                        | T2: AFILEGDNLIPK | 8.2   | -1.8          |
|        |        | P43179  | 67                                 | T1,T2,T3,T6,T7,T8,T10,T11    | 3.2           | 5                      |                  | -     | -             |
| P15494 |        | 56      | T2,T3,T6,T7,T8,T10,T11             | 2.8                          |               |                        | -                | -     |               |
| P43186 |        | 55      | T1,T2,T3,T4,T8,T11                 | 2.7                          |               | T2: AFILDGDNLIPK       | 8.0              | -1.8  |               |
| 11     | P43177 | 78      | T1,T2,T3,T5,T6,T7,T8,T9,T10,T11    | 6.1                          |               | T1 MGVFNYEIETTSVIPAAAR | 9.0              | 2.1   |               |
|        | P43180 | 78      | T1,T2,T3,T5,T6,T7,T8,T9,T10,T11    | 6.1                          |               |                        | -                | -     |               |
|        | P43186 | 74      | T1,T2,T3,T4,T6,T8,T11              | 8.1                          |               |                        | -                | -     |               |
|        | P15494 | 84      | T1,T2,T3,T4,T5,T6,T7,T8,T9,T10,T11 | 6.1                          | 7             |                        | -                | -     |               |
|        | Q96370 | 84      | T1,T2,T3,T4,T5,T6,T7,T8,T9,T10,T11 | 6.4                          |               | T6: YNYSVIEGGPMGDTLEK  | 9.8              | 1.0   |               |
|        | P43178 | 84      | T1,T2,T3,T4,T5,T6,T7,T8,T9,T10,T11 | 3.3                          |               |                        | -                | -     |               |
|        | O23748 | 78      | T1,T2,T3,T4,T6,T7,T8,T9,T10,T11    | 6.5                          |               | T6: YSYSLIEGGPVGDTLEK  | 8.2              | 2.0   |               |

| Gel    | Spot   | UniProt | Seq. Cov.%                      | assigned peptides                  | Protein Error | N                | P*                    | Score | Peptide Error |
|--------|--------|---------|---------------------------------|------------------------------------|---------------|------------------|-----------------------|-------|---------------|
| C      | 12     | P43186  | 34                              | T1,T2,T8,T11                       | 2.9           | 2                | -                     | -     | -             |
|        |        | P15494  | 24                              | T2,T8,T11                          | 2.6           | -                | -                     | -     | -             |
|        | 15     | P15494  | 49                              | T1,T2,T3,T8,T11                    | 2.7           | 1                | -                     | -     | -             |
|        | 16     | P43186  | 79                              | T1,T2,T3,T4,T5,T6,T7,T8,T10,T11    | 3.0           | -                | -                     | -     | -             |
|        |        | P43180  | 41                              | T1,T2,T3,T11                       | 3.2           | 3                | -                     | -     | -             |
|        |        | P15494  | 66                              | T1,T2,T3,T4,T6,T8,T11              | 2.9           | -                | -                     | -     | -             |
|        | 17     | Q39427  | 40                              | T1,T2,T3,T8                        | 2.6           | 2                | T2: AFILDGDNLIPK      | 6.6   | 0.7           |
|        |        | Q96370  | 40                              | T1,T2,T3,T8                        | 2.1           | -                | T2: AFILDGDNLVPK      | 6.7   | -0.5          |
|        | 18     | P43186  | 70                              | T2,T3,T4,T5,T6,T7,T8,T10,T11       | 5.1           | -                | -                     | -     | -             |
|        |        | P15494  | 72                              | T1,T2,T3,T4,T5,T6,T8,T11           | 6.6           | 4                | -                     | -     | -             |
|        |        | P43180  | 37                              | T2,T3,T5,T11                       | 5.9           | -                | -                     | -     | -             |
|        |        | O23749  | 69                              | T1,T2,T3,T4,T5,T6,T8,T10,T11       | 5.1           | -                | T10: EKGETLLR         | 8.0   | 1.6           |
|        | 19     | Q39431  | 67                              | T1,T2,T3,T4,T6,T7,T10,T11          | 4.8           | -                | T6: YSYSVIEGGPIGDTLEK | 7.6   | 2.5           |
|        |        | P43177  | 84                              | T1,T2,T3,T4,T5,T6,T7,T8,T9,T10,T11 | 5.0           | -                | -                     | -     | -             |
|        |        | P43180  | 73                              | T2,T3,T4,T5,T6,T7,T8,T9,T10,T11    | 5.2           | 5                | -                     | -     | -             |
|        |        | Q0QLS9  | 71                              | T2,T3,T4,T5,T6,T8,T9,T10           | 4.6           | -                | T8: IVATPDGGCILK      | 8.0   | 4.1           |
|        |        | Q39427  | 49                              | T1,T2,T3,T8,T11                    | 5.0           | -                | -                     | -     | -             |
|        | 20     | P43177  | 81                              | T1,T2,T3,T4,T5,T6,T7,T8,T10,T11    | 3.7           | -                | -                     | -     | -             |
|        |        | P43183  | 81                              | T1,T2,T3,T4,T5,T6,T7,T8,T10,T11    | 3.6           | -                | -                     | -     | -             |
|        |        | P43179  | 81                              | T1,T2,T3,T4,T5,T6,T7,T8,T10,T11    | 3.6           | 5                | -                     | -     | -             |
| P43180 |        | 81      | T1,T2,T3,T4,T5,T6,T7,T8,T10,T11 | 3.8                                | -             | -                | -                     | -     |               |
| Q9SCH6 |        | 68      | T1,T2,T3,T4,T5,T6,T7,T11        | 3.9                                | -             | -                | -                     | -     |               |
| 21     | P43184 | 81      | T1,T2,T3,T4,T5,T6,T7,T8,T10,T11 | 4.1                                | -             | T2: AFILEGDTLIPK | 9.8                   | -11.7 |               |
|        | P43180 | 64      | T1,T2,T3,T6,T8,T10,T11          | 4.2                                | 4             | -                | -                     | -     |               |
|        | P15494 | 54      | T2,T3,T6,T8,T10,T11             | 4.5                                | -             | -                | -                     | -     |               |
|        | P43177 | 64      | T1,T2,T3,T6,T8,T10,T11          | 4.6                                | -             | -                | -                     | -     |               |

| Gel | Spot | UniProt | Seq. Cov. % | assigned peptides                  | Protein Error | N | P*               | Score | Peptide Error |
|-----|------|---------|-------------|------------------------------------|---------------|---|------------------|-------|---------------|
| 24  |      | P43177  | 49          | T2,T3,T6,T8,T11                    | 2.8           | 2 | -                | -     | -             |
|     |      | P43179  | 34          | T3,T6,T11                          | 3.1           |   | -                | -     | -             |
| 26  |      | P43177  | 72          | T1,T2,T3,T4,T5,T6,T8,T11           | 3.0           | 2 | -                | -     | -             |
|     |      | P15494  | 58          | T1,T3,T5,T6,T8,T11                 | 3.4           |   | -                | -     | -             |
| 27  |      | O23749  | 73          | T1,T2,T3,T4,T6,T7,T8,T10,T11       | 4.0           | 2 | T2: AFILDGDNLIPK | 9.2   | 2.6           |
|     |      | P43180  | 73          | T1,T2,T3,T4,T6,T7,T8,T10,T11       | 4.7           |   | T2: AFILEGDNLIPK | 8.1   | 2.3           |
| 28  |      | O23749  | 88          | T1,T2,T3,T4,T5,T6,T7,T8,T9,T10,T11 | 4.7           | - |                  | -     | -             |
|     |      | Q0QLV2  | 83          | T1,T2,T3,T4,T5,T6,T7,T8,T9,T10     | 4.9           | 3 | -                | -     | -             |
|     |      | Q39415  | 46          | T1,T2,T3,T5,T8                     | 5.8           | - |                  | -     | -             |
| 29  |      | O23749  | 74          | T1,T2,T3,T4,T6,T7,T8,T10,T11       | 3.7           | 2 | -                | -     | -             |
|     |      | Q0QLV2  | 67          | T2,T3,T4,T6,T7,T8,T10              | 3.5           |   | -                | -     | -             |
| 30  |      | O23749  | 50          | T1,T2,T3,T4,T8,T10                 | 3.8           | 2 | -                | -     | -             |
|     |      | P43180  | 33          | T1,T2,T3                           | 3.1           |   | -                | -     | -             |
| 31  |      | P43177  | 81          | T1,T2,T3,T4,T5,T6,T7,T8,T10,T11    | 3.4           | 2 | -                | -     | -             |
|     |      | P43179  | 56          | T1,T3,T5,T7,T8,T10,T11             | 5.1           |   | -                | -     | -             |
| 35  |      | P43186  | 32          | T1,T2,T4,T8                        | 3.5           | 1 | -                | -     | -             |
| 36  |      | P43180  | 41          | T1,T2,T3,T11                       | 2.7           | 2 | -                | -     | -             |
|     |      | P43186  | 69          | T1,T2,T3,T4,T6,T7,T8,T11           | 3.3           |   | -                | -     | -             |
| 37  |      | P43180  | 41          | T1,T2,T3,T11                       | 4.5           | 2 | -                | -     | -             |
|     |      | P43186  | 55          | T1,T2,T3,T4,T8,T11                 | 3.1           |   | -                | -     | -             |

**Gel & Spot:** nomenclature refer to figure 1; **Seq Cov.:** sequence coverage was manually calculated including only pass one matches; **T:** peptide nomenclature refers to figure 3; **protein error:** precursor RMS mass error in ppm; **N:** number of isoforms per spot; **P:** aminoacid sequence of peptides if protein was identified with one peptide only; **\***: fragmentation spectra of these peptides are shown in supplementary table S4 **Score:** protein score as by PLGS; **peptide error:** individual precursor mass error in ppm

Spot 20

P43177

PLGS peptide score

8.2

Peptide MH+Error(ppm)

0.9

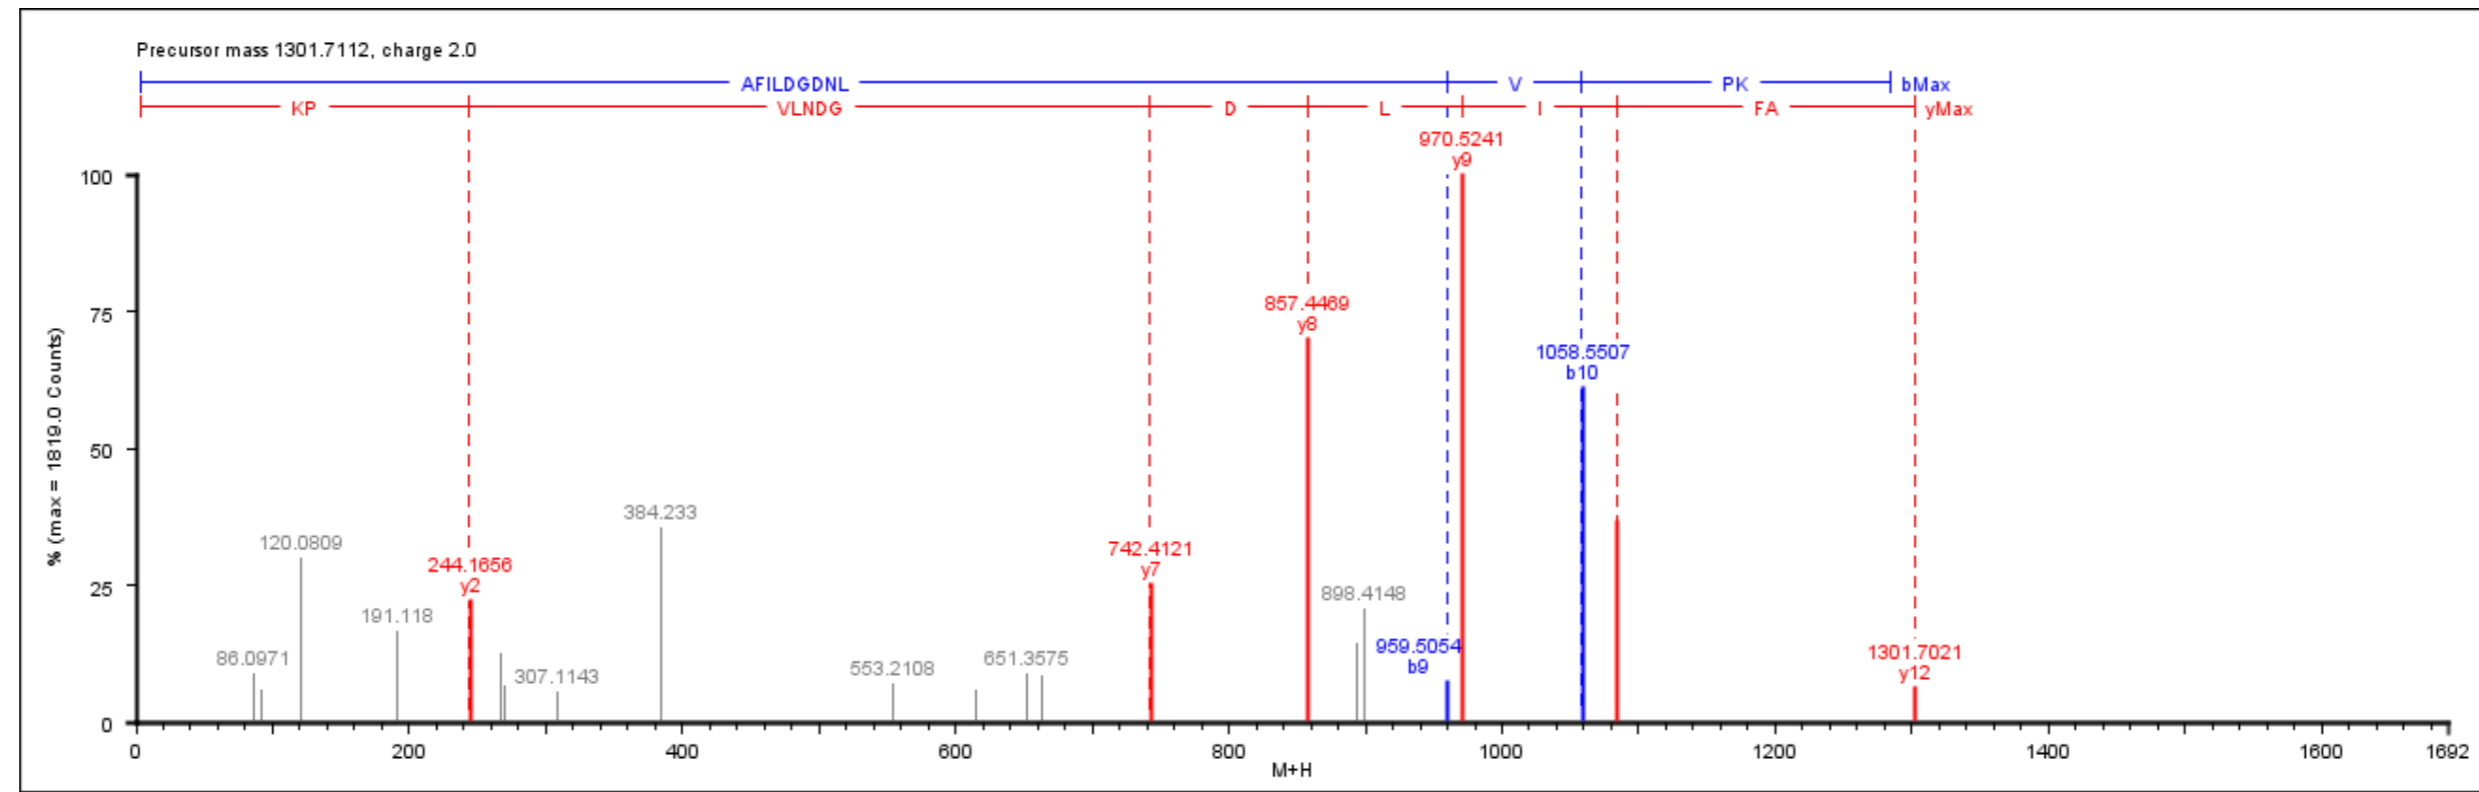

P43180

PLGS peptide score

7.5

Peptide MH+Error(ppm)

2.8

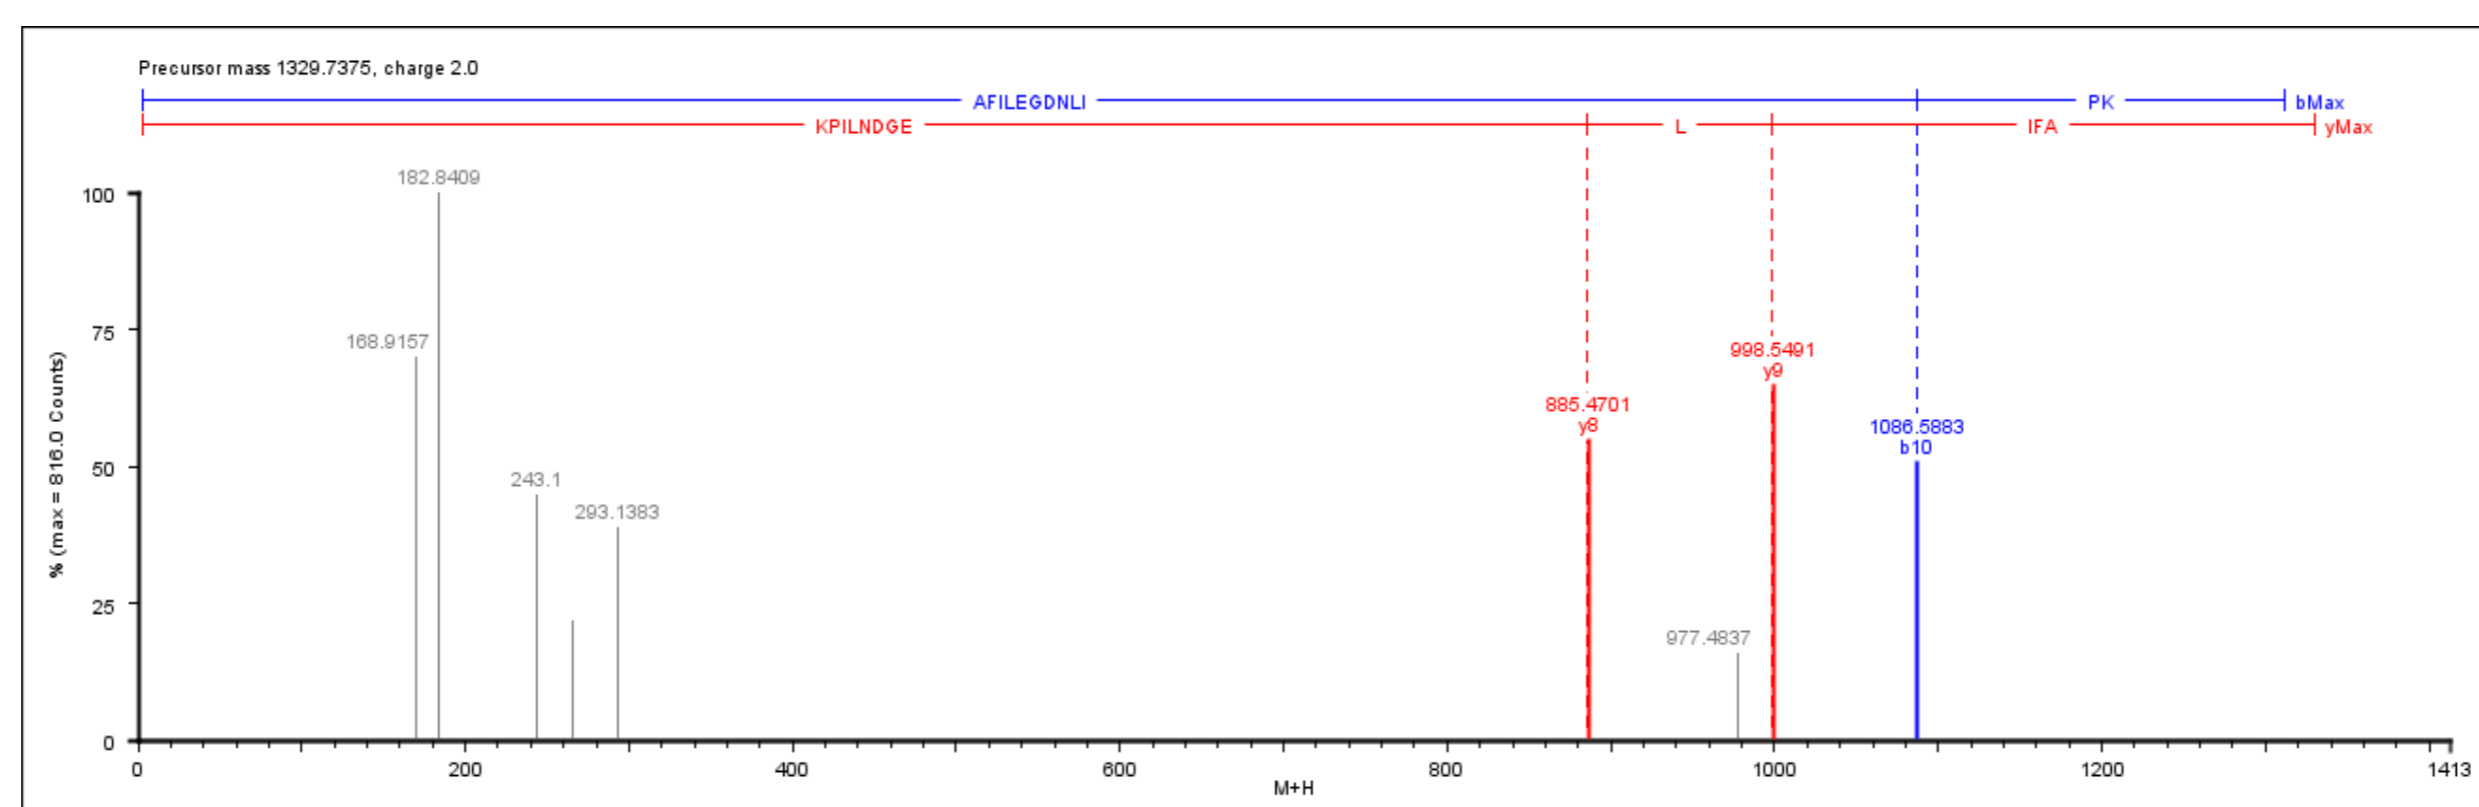

spot 6

P43180

PLGS peptide score

8.7

Peptide MH+Error(ppm)

0.6

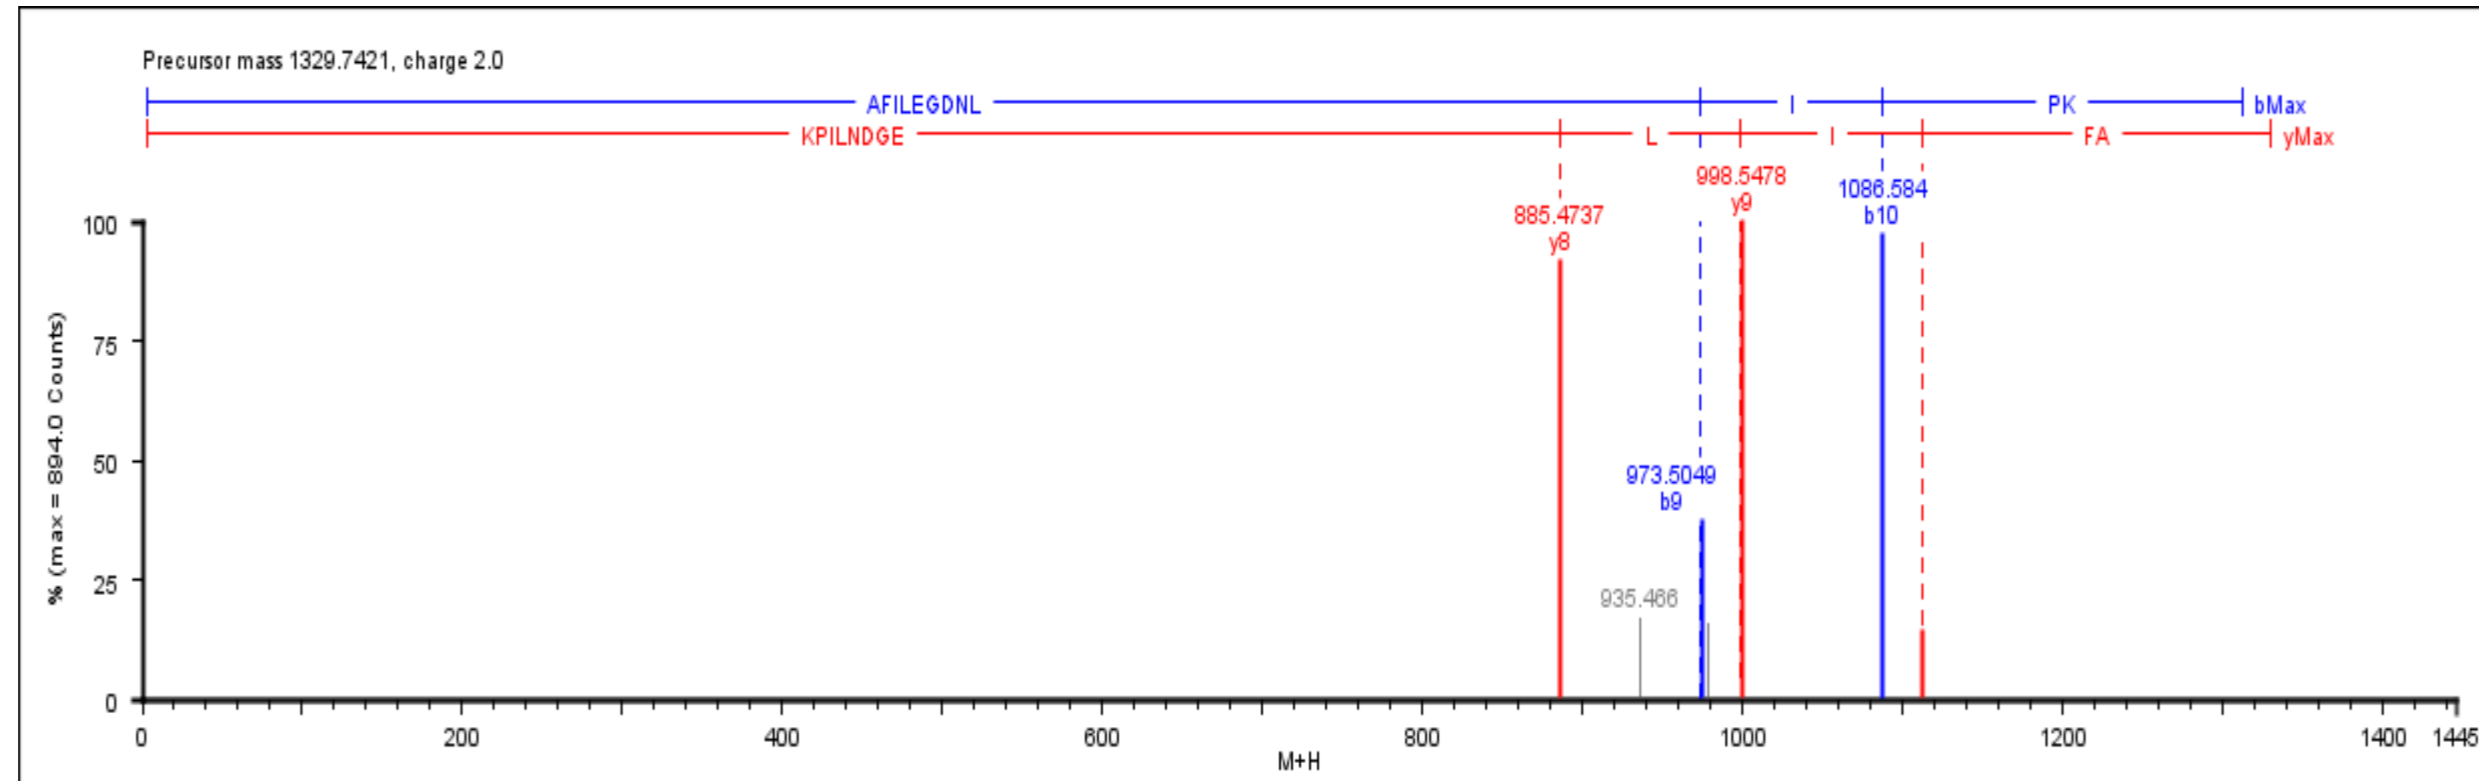

P43186

PLGS peptide score

9.0

Peptide MH+Error(ppm)

1.0

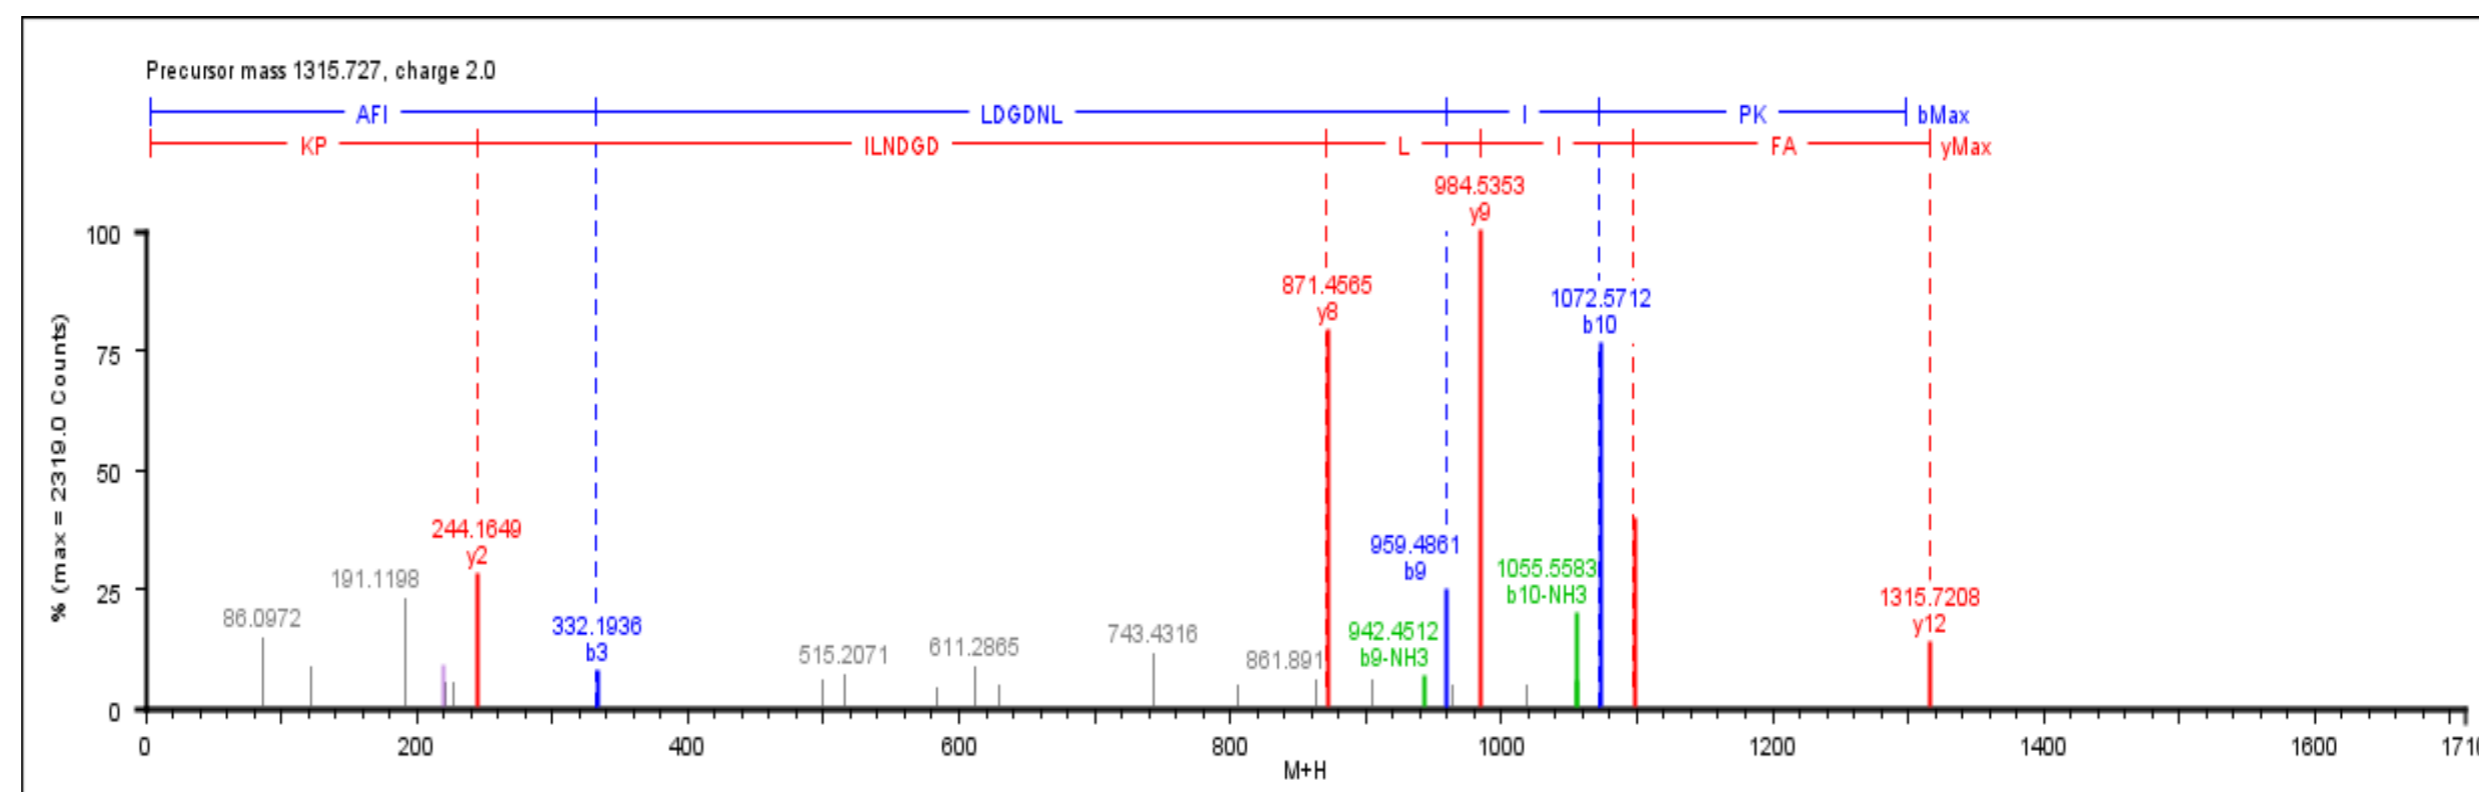

spot 8

P43180

PLGS peptide score

8.2

Peptide MH+Error(ppm)

-1.8

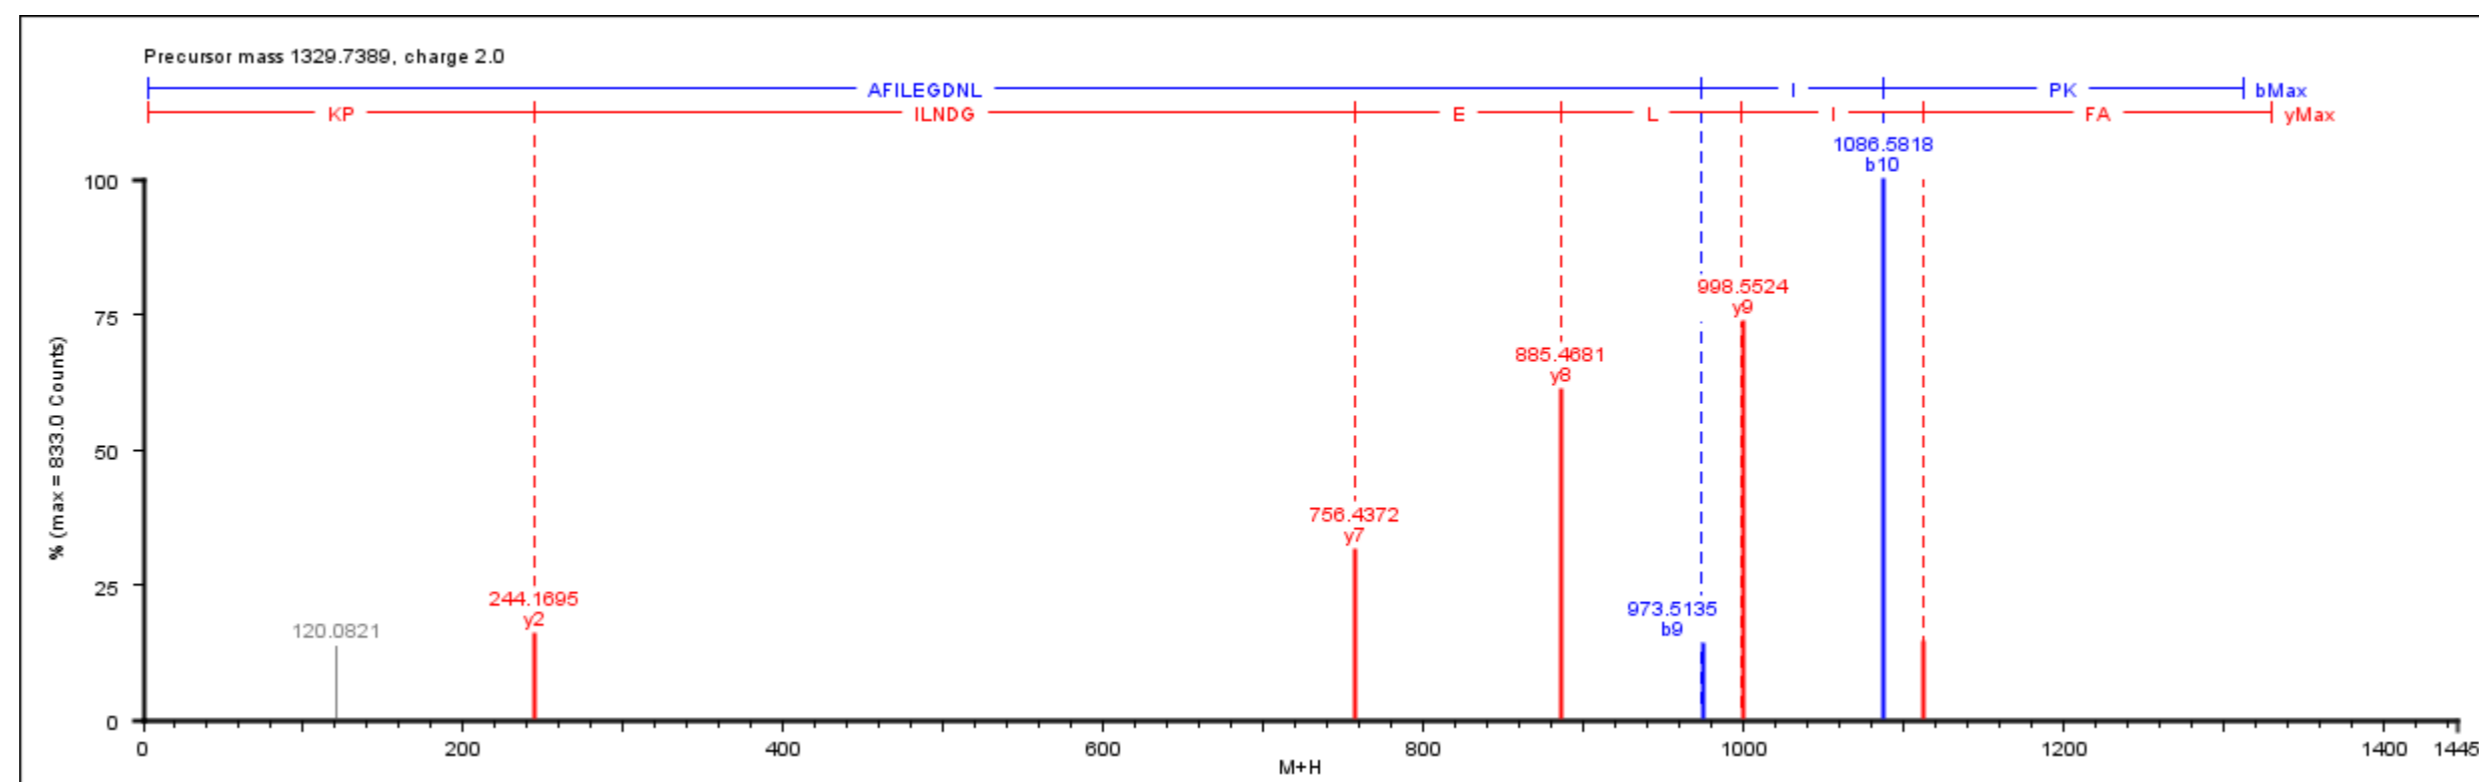

P43186

PLGS peptide score

8.0

Peptide MH+Error(ppm)

-1.8

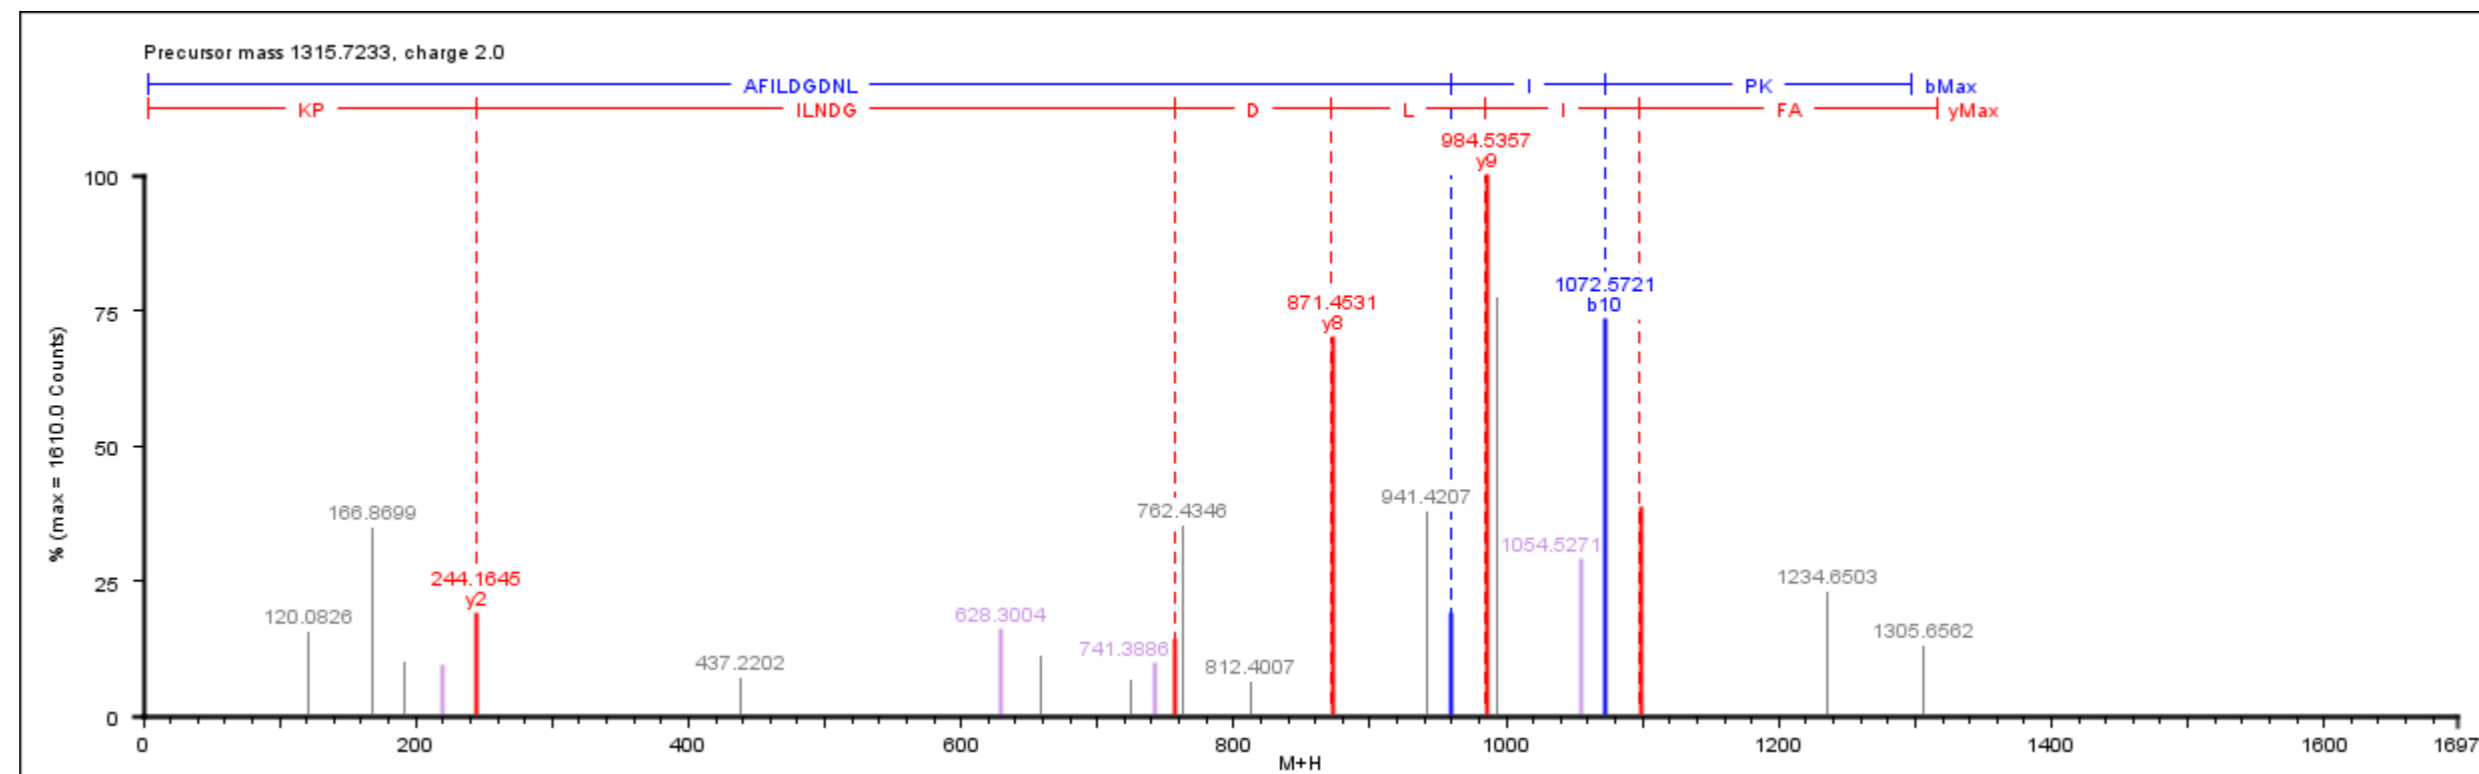



spot 11

PLGS peptide score  
Peptide MH+Error(ppm)

P43177

9.0  
2.1

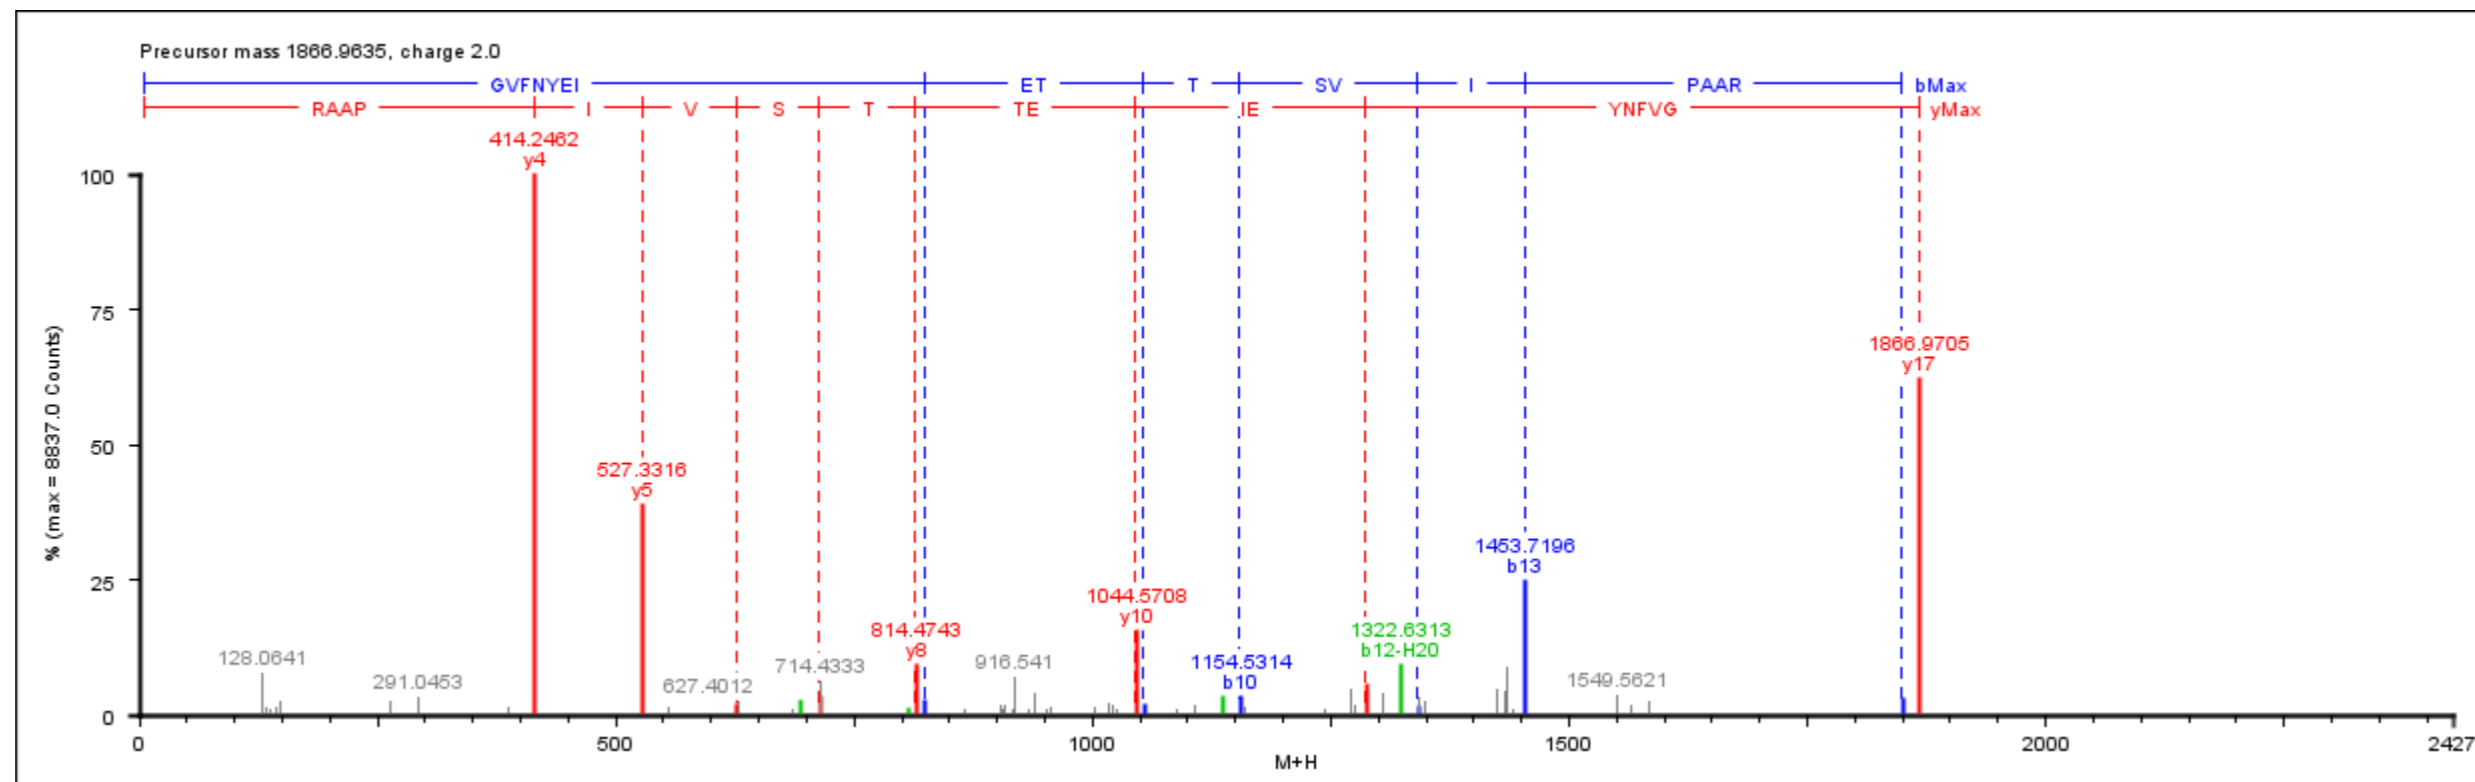

PLGS peptide score  
Peptide MH+Error(ppm)

Q96370

9.8  
1.0

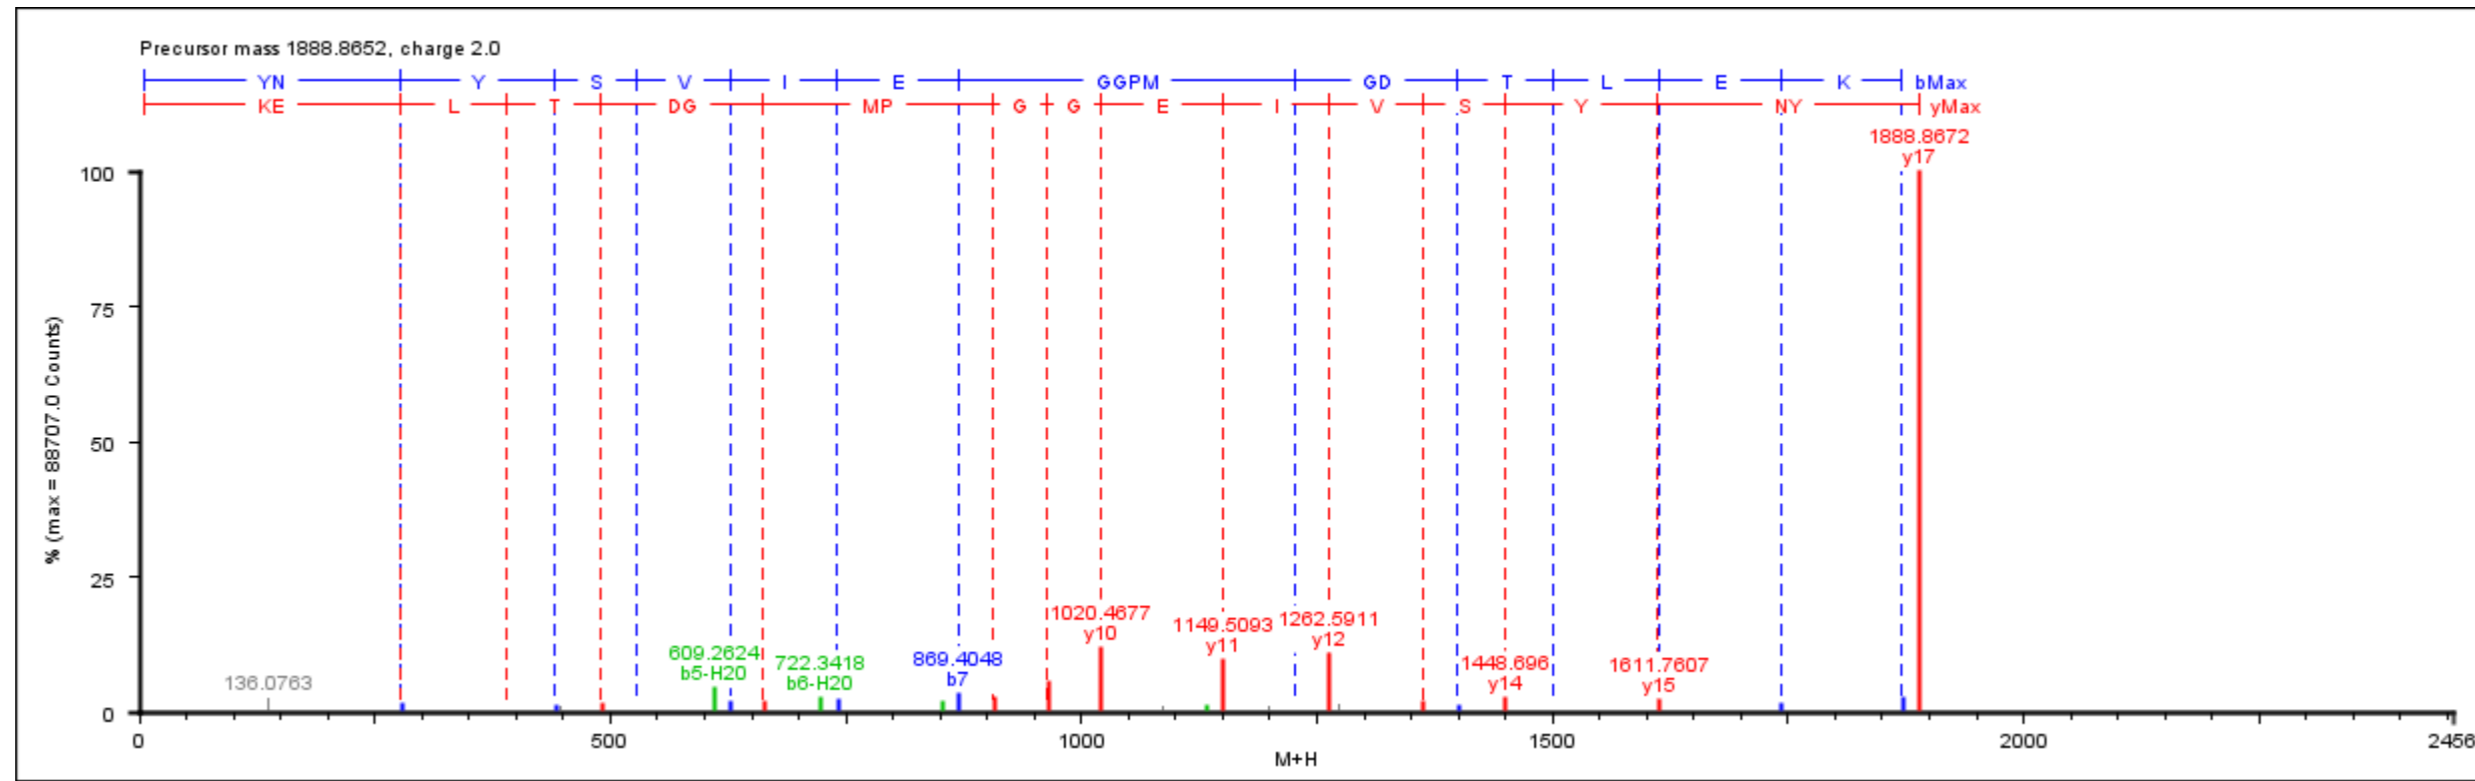

PLGS peptide score  
Peptide MH+Error(ppm)

O23748

8.2  
2.0

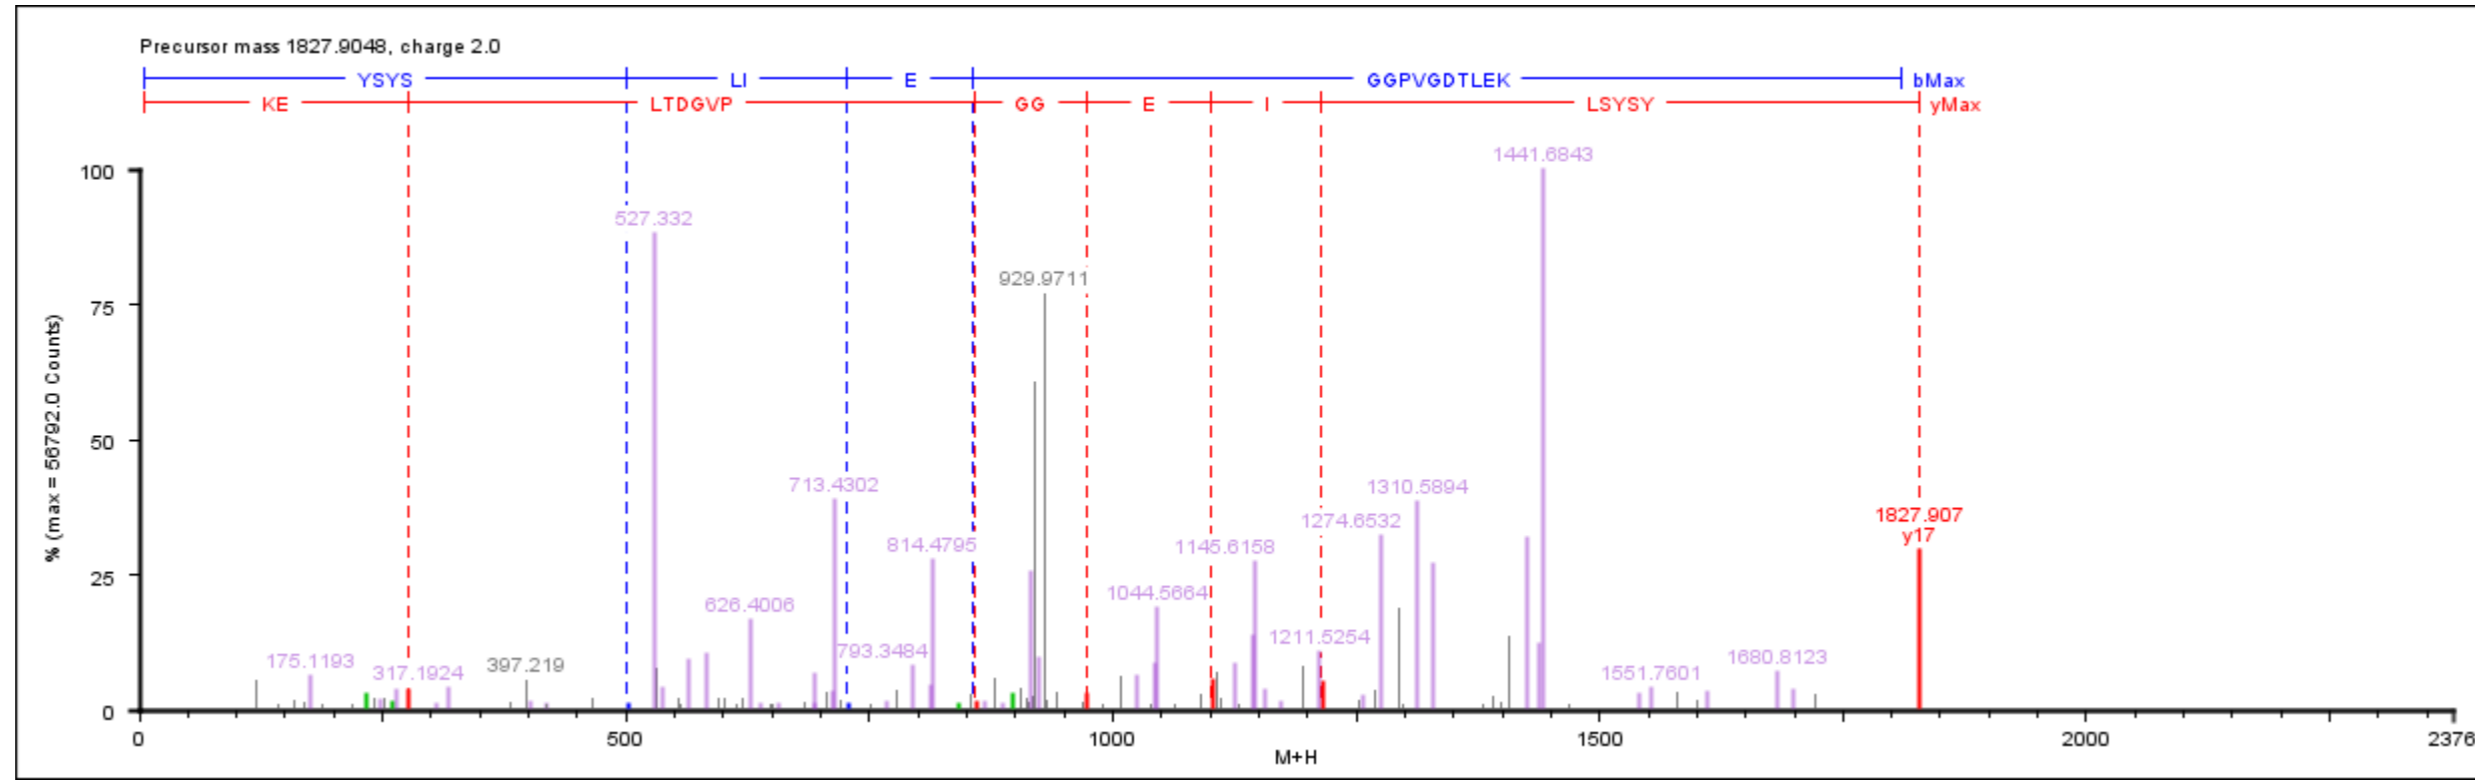

Spot 17

PLGS peptide score  
Peptide MH+Error(ppm)

Q39427  
6.6  
0.7

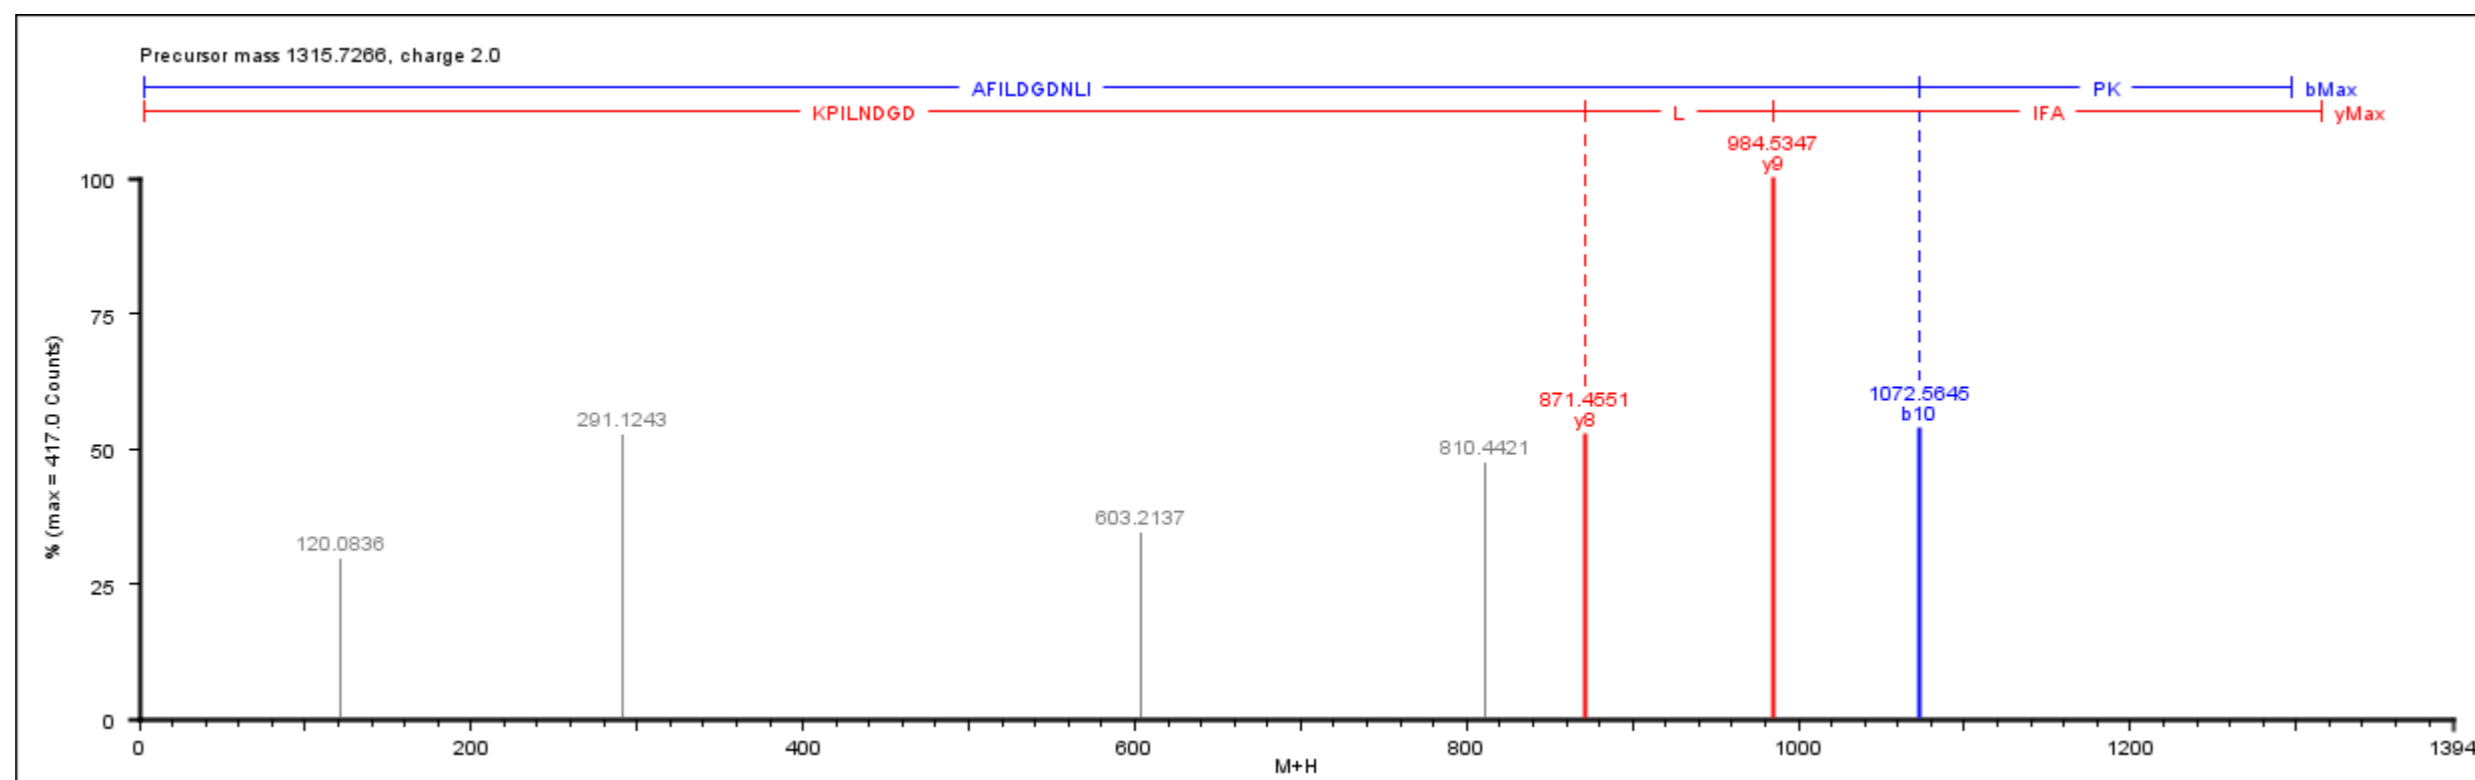

PLGS peptide score  
Peptide MH+Error(ppm)

Q96370  
6.7  
-0.5

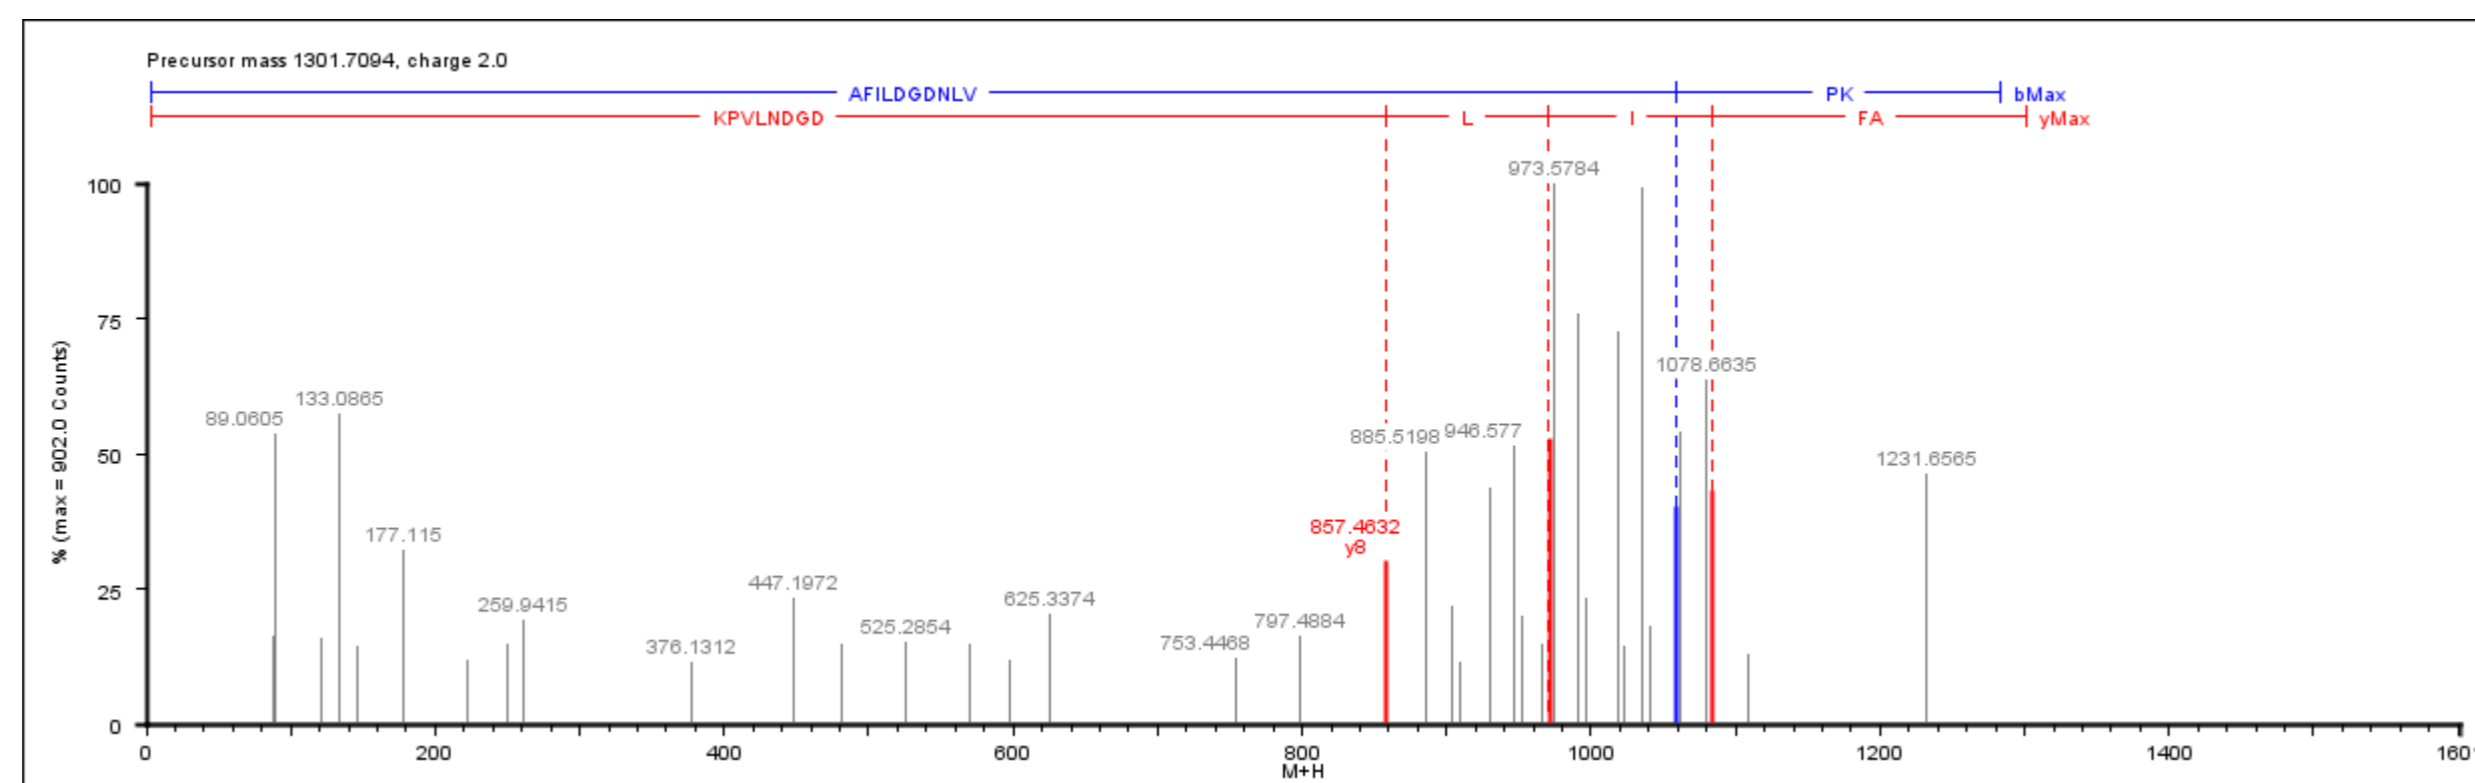

spot 18

PLGS peptide score  
Peptide MH+Error(ppm)

O23749  
8.0  
1.6

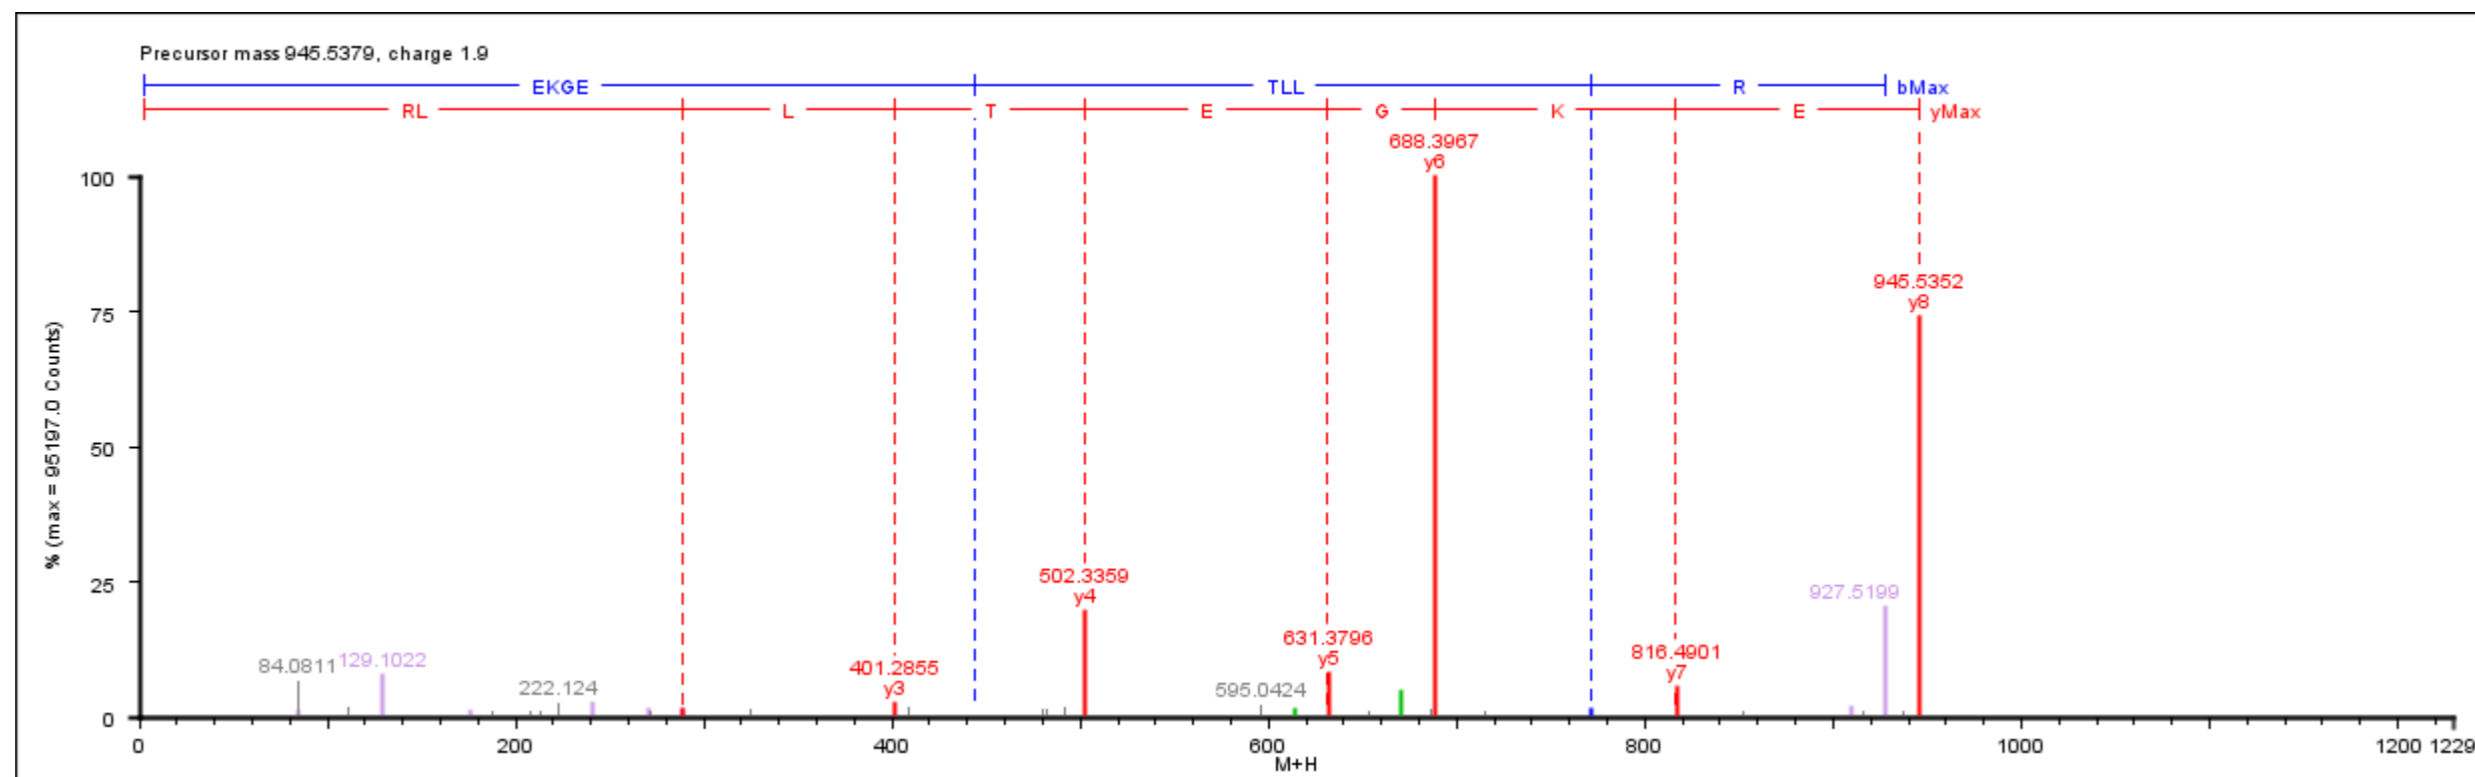

spot 19

Q0QLS9

PLGS peptide score  
Peptide MH+Error(ppm)

8.0  
4.1

Missing spectra for q39427

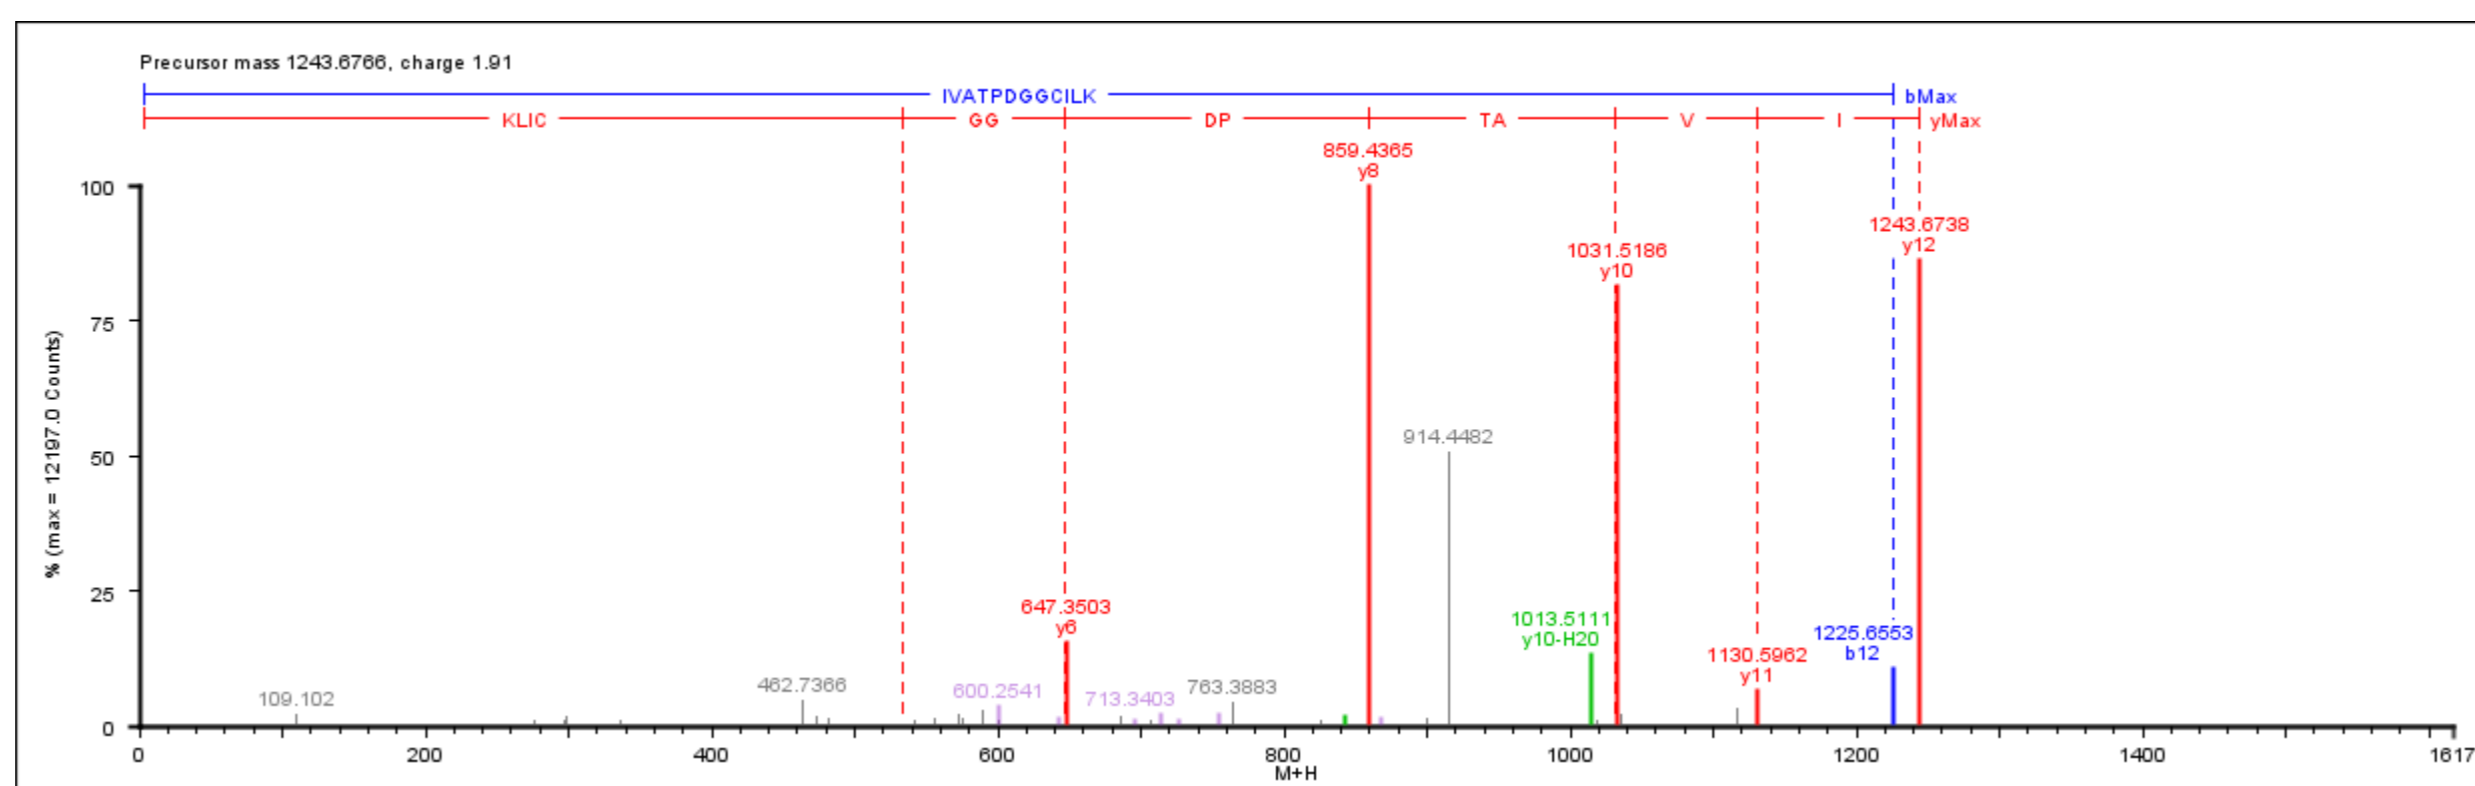

PLGS peptide score  
Peptide MH+Error(ppm)

7.6  
2.5

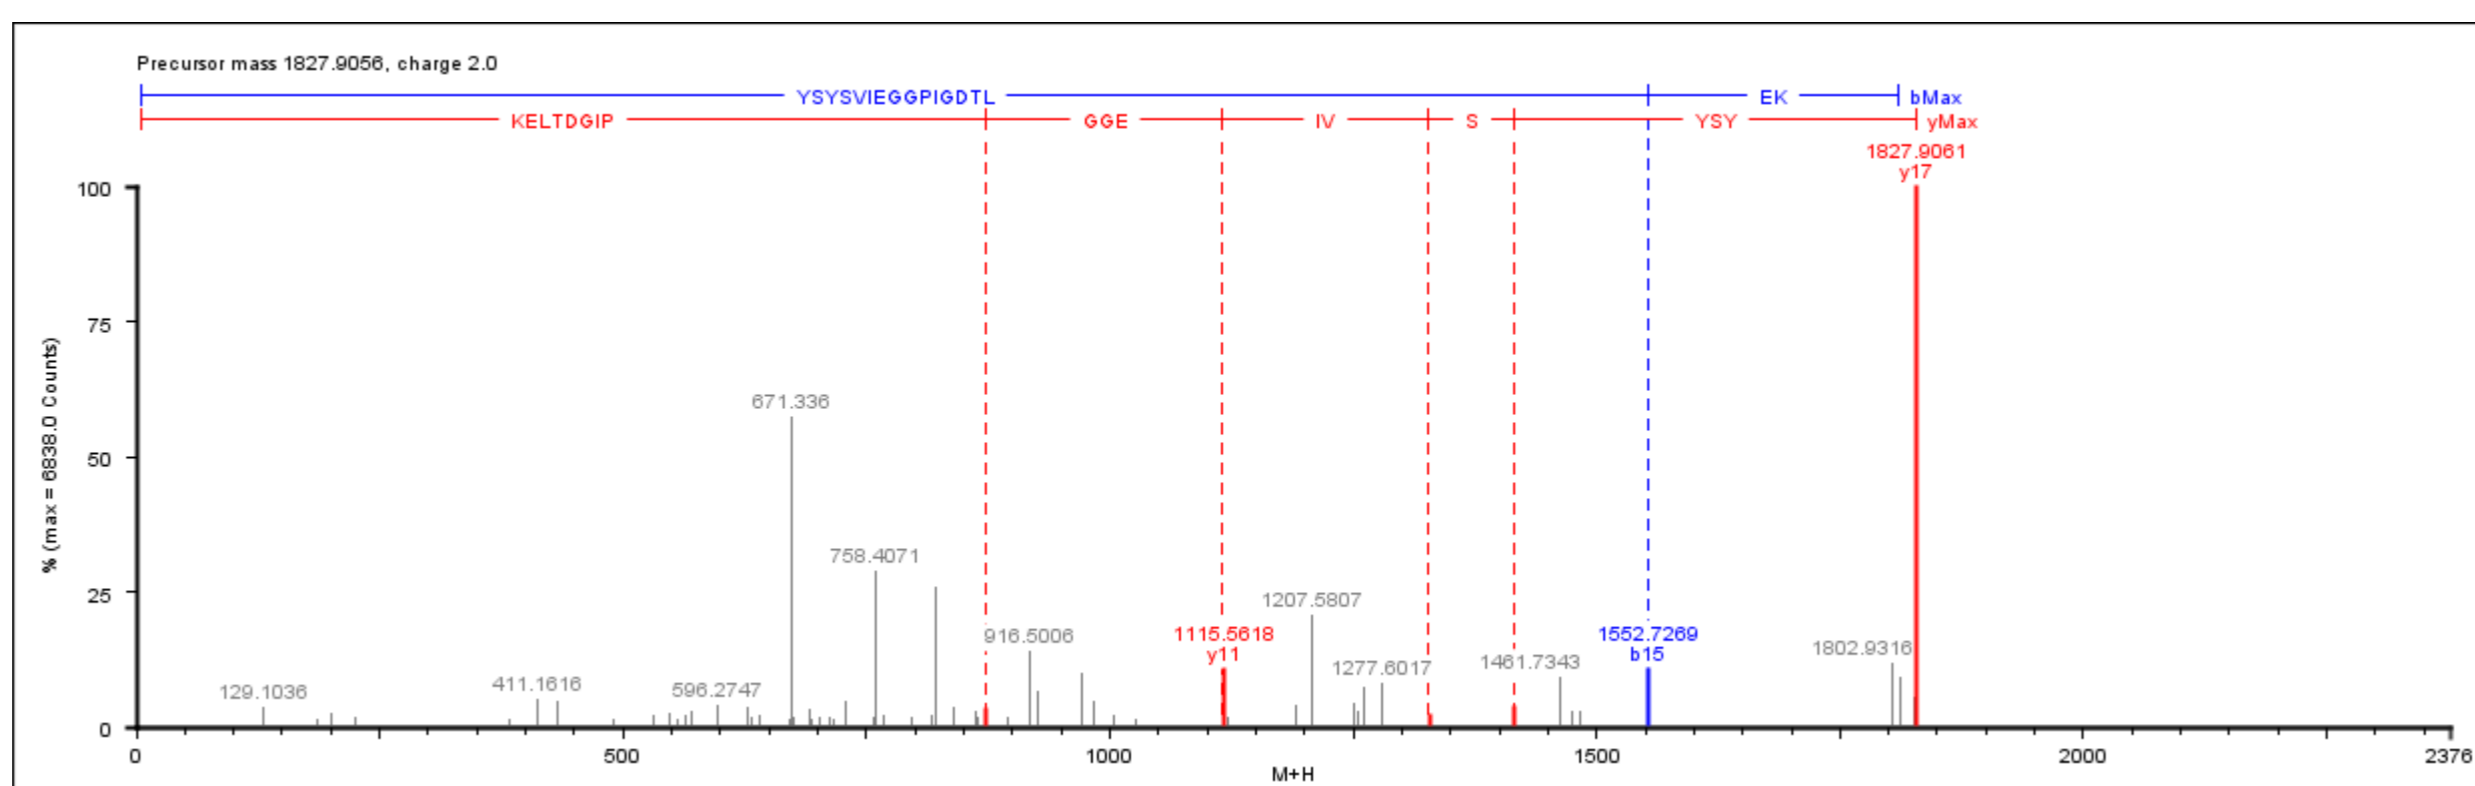

Spot 21

P43184

PLGS peptide score  
Peptide MH+Error(ppm)

9.8  
-11.7

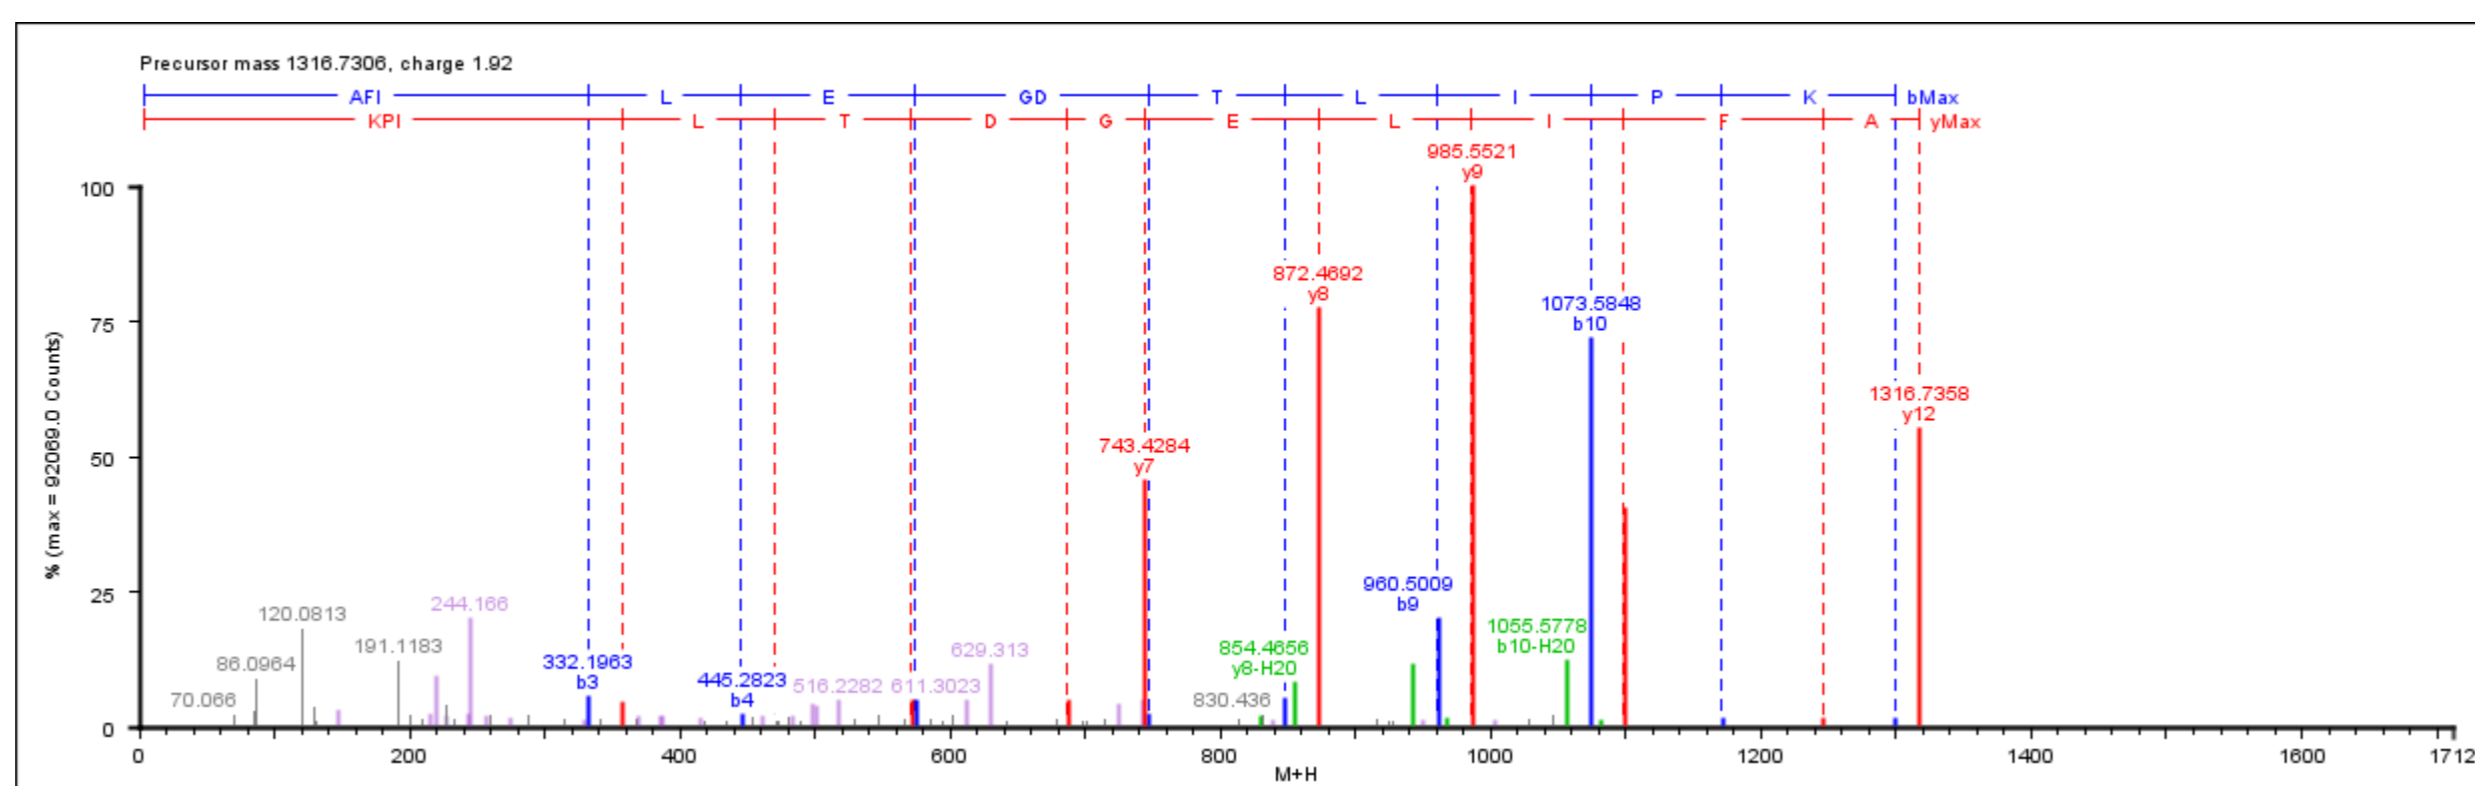

spot 27

PLGS peptide score  
Peptide MH+Error(ppm)

O23749

9.2  
2.6

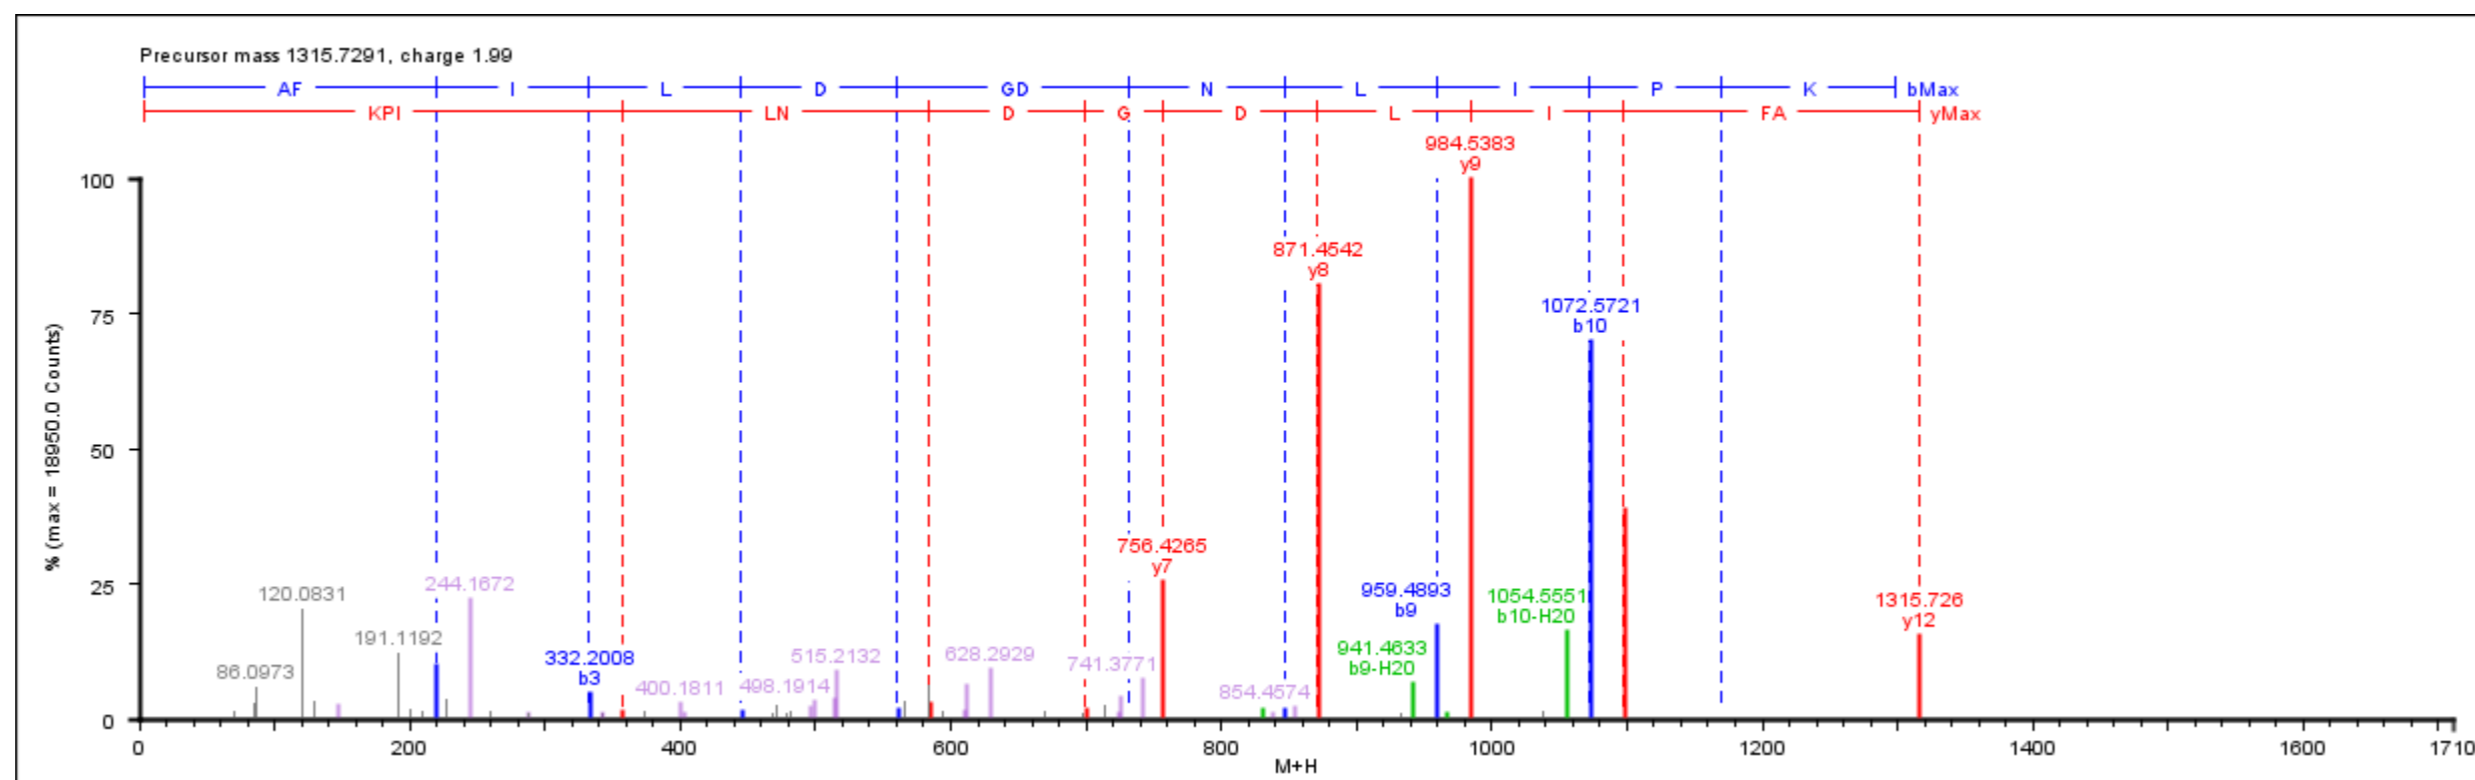

P43180

PLGS peptide score  
Peptide MH+Error(ppm)

8.1  
2.3

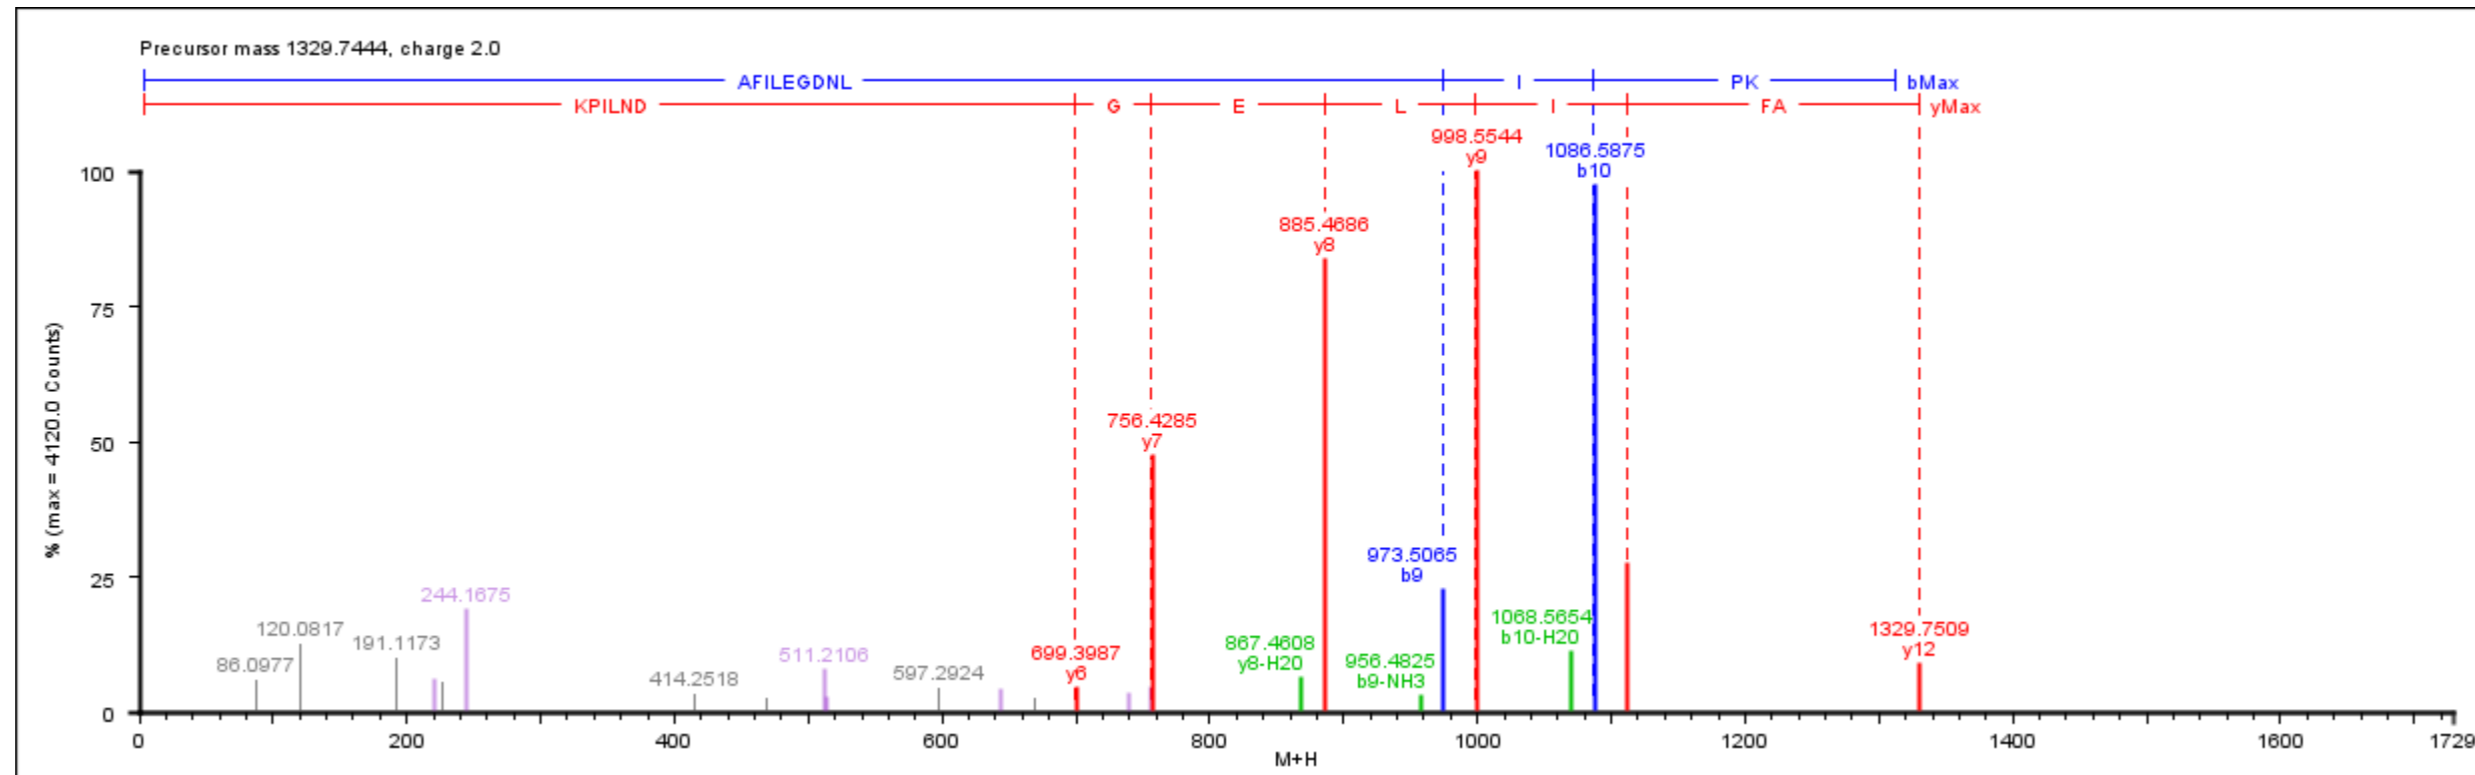

Supplement: S1 (10.1371/journal.pone.0142404.s001) [file journal.pone.0142404.s001.PDF]
